# Supplementary material
Source: PubMed Central journal article supplement (PMC9021236)
Supplement: 41598_2022_10413_MOESM4_ESM.pdf [file 41598_2022_10413_MOESM4_ESM.pdf]

**Supplementary Table S1: Designed primers for this study and the mutations profile link.**

| Primer name  | Mutation in 3' end | Specificity of Primer ( <i>Homo Sapiens</i> , other organisms*)                                                                                                                                                                                                                                                                                                                                                                                                                                                                                                                         | <a href="https://covariants.org/variants">https://covariants.org/variants</a> | <a href="https://bigd.big.ac.cn/ncov/variation/annotation">https://bigd.big.ac.cn/ncov/variation/annotation</a> |
|--------------|--------------------|-----------------------------------------------------------------------------------------------------------------------------------------------------------------------------------------------------------------------------------------------------------------------------------------------------------------------------------------------------------------------------------------------------------------------------------------------------------------------------------------------------------------------------------------------------------------------------------------|-------------------------------------------------------------------------------|-----------------------------------------------------------------------------------------------------------------|
| JUST_E1_F    | No <sup>§</sup>    | No target templates were found in selected database: Refseq mRNA (Organism limited to <i>Homo sapiens</i> )                                                                                                                                                                                                                                                                                                                                                                                                                                                                             | No Mutation (at the 4 <sup>th</sup> base of 3'-end <sup>#</sup> )             | 26270, 26256, 26262, 26257                                                                                      |
| JUST_E1_R    | No <sup>§</sup>    | Target template found with SARS-CoV-2 isolate Wuhan-Hu-1 and SARS coronavirus Tor2, complete genome                                                                                                                                                                                                                                                                                                                                                                                                                                                                                     | No Mutation <sup>§</sup>                                                      | None                                                                                                            |
| JUST_N1_F    | No <sup>§</sup>    | No target templates were found in selected database: Refseq mRNA (Organism limited to <i>Homo sapiens</i> )                                                                                                                                                                                                                                                                                                                                                                                                                                                                             | No Mutation <sup>§</sup>                                                      | 29422, 29427,                                                                                                   |
| JUST_N1_R    | No <sup>§</sup>    | Target template found with SARS-CoV-2 isolate Wuhan-Hu-1 and SARS coronavirus Tor2, complete genome                                                                                                                                                                                                                                                                                                                                                                                                                                                                                     | No Mutation <sup>§</sup>                                                      | 28541                                                                                                           |
| JUST_RdRp1_F | No                 | No target templates were found in selected database: Refseq mRNA (Organism limited to <i>Homo sapiens</i> )                                                                                                                                                                                                                                                                                                                                                                                                                                                                             | No mutation                                                                   | None                                                                                                            |
| JUST_RdRp1_R | No                 | Target template found with SARS-CoV-2 isolate Wuhan-Hu-1 and SARS coronavirus Tor2, complete genome                                                                                                                                                                                                                                                                                                                                                                                                                                                                                     | No mutation                                                                   | None                                                                                                            |
| JUST_S1_F    | No                 | No target templates were found in selected database: Refseq mRNA (Organism limited to <i>Homo sapiens</i> )                                                                                                                                                                                                                                                                                                                                                                                                                                                                             | No mutation                                                                   | 21637, 21638, 21621, 21624                                                                                      |
| JUST_S1_R    | No                 | Target template found with SARS-CoV-2 isolate Wuhan-Hu-1                                                                                                                                                                                                                                                                                                                                                                                                                                                                                                                                | No mutation                                                                   | 23664                                                                                                           |
|              |                    | *Organisms investigated (Taxonomy ID): HCoV-HKU1 (290028); HCoV-OC43 (31631); HCoV-NL63 (277944); HCoV-229E (11137); MERS-CoV (1335626); H1N1 (114727); H3N2 (119210); Influenza (untyped) (11309); H5N1 (102793); H7N9 (333278); Influenza B (11520); Respiratory Syncytial Virus (11250); Parainfluenza 1 virus (12730); Parainfluenza 2 virus (1979160); Parainfluenza 3 virus (11216); Parainfluenza 4 virus A (11224); Parainfluenza 4 virus B (11226); Human Metapneumovirus (162145); Human Bocavirus (329641); Mycoplasma spp. (2093). Rhinovirus/Enterovirus (12059); SARS-CoV |                                                                               |                                                                                                                 |

§ Considering mutations of Delta and Omicron variants

# For the omicron variant E:T9I (C26T) mutation.

**Supplementary Table S2: Data of primer optimization in different combinations**

| <b>Primer Combination</b> | <b>Sample ID</b> | <b>Ct Value</b> | <b>Melting Temperature</b> | <b>Derivative Reporter</b> |                             |
|---------------------------|------------------|-----------------|----------------------------|----------------------------|-----------------------------|
| <b>Single-plex Assay</b>  |                  |                 |                            |                            |                             |
|                           |                  |                 |                            |                            |                             |
| JUST_N1                   | 103.49           | 28.865          | 82.117                     | 49,427.047                 | JUST_N1 Specific (Positive) |
|                           | 103.59           | 27.081          | 82.422                     | 44,041.594                 |                             |
|                           | 105.92           | 24.958          | 82.422                     | 33,674.445                 |                             |
|                           | 105.82           | 31.496          | 74.949                     | 33,807.930                 | Non-specific (Negative)     |
| 80.897                    |                  |                 | 16,299.283                 |                            |                             |
|                           |                  |                 |                            |                            |                             |
| JUST_E1                   | 103.49           | 28.266          | 79.046                     | 40,590.711                 | JUST_E1 Specific (Positive) |
|                           | 103.59           | 26.847          | 79.504                     | 50,604.645                 |                             |
|                           | 105.92           | 25.883          | 79.656                     | 48,298.816                 |                             |
|                           | 105.82           | 33.038          | 66.095                     | 10,334.008                 | Non-specific (Negative)     |
|                           |                  |                 | 82.246                     | 20,230.045                 |                             |
|                           |                  |                 | 85.141                     | 17,941.426                 |                             |
|                           |                  |                 |                            |                            |                             |
| JUST_S1                   | 103.49           | 25.997          | 76.324                     | 51,881.965                 | JUST_S1 Specific (Positive) |
|                           | 103.59           | 25.233          | 76.629                     | 34,492.000                 |                             |
|                           | 105.92           | 23.581          | 76.629                     | 36,840.020                 |                             |
|                           | 105.82           | 31.273          | 67.628                     | 9,944.588                  | Non-specific (Negative)     |
| 74.341                    |                  |                 | 30,616.861                 |                            |                             |
|                           |                  |                 |                            |                            |                             |
| JUST_RdRp1                | 103.49           | 27.599          | 77.366                     | 50,752.266                 | JUST_RdRp1                  |

|                        |         |        |        |            |                            |
|------------------------|---------|--------|--------|------------|----------------------------|
|                        | 103.59  | 26.594 | 77.671 | 50,150.043 | Specific (Positive)        |
|                        | 105.92  | 24.918 | 77.671 | 41,050.215 |                            |
|                        | 105.82  | 34.294 | 80.413 | 28,342.781 | Non-specific<br>(Negative) |
|                        |         |        |        |            |                            |
| Beta-actin             | 117.199 | 23.377 | 87.728 | 51,152.402 | Beta-actin Specific        |
|                        | 100.115 | 25.559 | 87.470 | 49,336.742 |                            |
|                        |         |        |        |            |                            |
| GAPDH                  | 117.199 | 31.161 | 82.928 | 63,028.238 | GAPDH Specific             |
|                        |         |        | 69.481 | 17,801.490 | Non-specific               |
|                        | 100.115 | 36.145 | 82.979 | 45,427.840 | GAPDH Specific             |
|                        |         |        |        |            |                            |
| <b>Duplex Assay</b>    |         |        |        |            |                            |
|                        |         |        |        |            |                            |
| JUST_N1<br>+JUST_E1    | 103.59  | 25.944 | 80.899 | 18,224.209 | JUST_N1 Specific           |
|                        |         |        | 77.696 | 9,732.452  | JUST_E1 Specific           |
|                        | 117.199 | 24.647 | 82.278 | 31,206.523 | JUST_N1 Specific           |
|                        |         |        | 78.905 | 97,134.820 | JUST_E1 Specific           |
|                        |         |        |        |            |                            |
| JUST_N1<br>+JUST_S1    | 103.59  | 26.613 | 81.662 | 16,774.512 | JUST_N1 Specific           |
|                        |         |        | 75.408 | 11,924.494 | JUST_S1 Specific           |
|                        | 117.199 | 24.178 | 82.278 | 16,230.109 | JUST_N1 Specific           |
|                        |         |        | 75.788 | 54,621.520 | JUST_S1 Specific           |
|                        |         |        |        |            |                            |
| JUST_N1<br>+JUST_RdRp1 | 103.59  | 26.774 | 81.967 | 18,510.281 | JUST_N1 Specific           |
|                        |         |        | 77.086 | 19,971.842 | JUST_RdRp1<br>Specific     |
|                        | 117.199 | 22.934 | 82.227 | 25,829.594 | JUST_N1 Specific           |
|                        |         |        | 76.861 | 67,849.789 | JUST_RdRp1                 |

|                                 |         |        |        |            |                        |
|---------------------------------|---------|--------|--------|------------|------------------------|
|                                 |         |        |        |            | Specific               |
| JUST_E1<br>+JUST_S1             | 117.199 | 24.265 | 78.956 | 80,005.727 | JUST_E1 Specific       |
|                                 |         |        |        |            |                        |
| JUST_E1<br>+JUST_RdRp1          | 117.199 | 23.429 | 78.905 | 61,383.828 | JUST_E1 Specific       |
|                                 |         |        | 76.605 | 25,566.580 | JUST_RdRp1<br>Specific |
|                                 |         |        |        |            |                        |
| JUST_S1<br>+JUST_RdRp1          | 117.199 | 22.878 | 77.014 | 68,878.430 | JUST_RdRp1<br>Specific |
|                                 |         |        |        |            |                        |
| JUST_N1<br>+GAPDH               | 117.199 | 24.509 | 82.267 | 51,459.141 | JUST_N1 Specific       |
|                                 |         |        | 83.905 | 29,276.434 | GAPDH Specific         |
|                                 |         |        | 73.361 | 14,140.837 | Non-specific           |
|                                 |         |        |        |            |                        |
| JUST_E1<br>+GAPDH               | 117.199 | 27.825 | 78.889 | 62,769.035 | JUST_E1 Specific       |
|                                 |         |        | 82.421 | 23,866.477 | GAPDH Specific         |
|                                 |         |        |        |            |                        |
| JUST_S1<br>+GAPDH               | 117.199 | 24.897 | 75.818 | 48,897.164 | JUST_S1 Specific       |
|                                 |         |        | 82.421 | 14,717.176 | GAPDH Specific         |
|                                 |         |        |        |            |                        |
| <b>Triplex</b>                  |         |        |        |            |                        |
|                                 |         |        |        |            |                        |
| JUST_N1<br>+JUST_E1<br>+JUST_S1 | 103.59  | 26.525 | 82.425 | 12,021.470 | JUST_N1 Specific       |
|                                 |         |        | 76.018 | 6,761.184  | JUST_S1 Specific       |
|                                 |         |        |        |            |                        |
| JUST_N1                         | 103.59  | 28.707 | 82.272 | 8,179.607  | JUST_N1 Specific       |

|                                                |         |        |        |            |                        |
|------------------------------------------------|---------|--------|--------|------------|------------------------|
| +JUST_RdRp1<br>+JUST_S1                        |         |        | 77.238 | 12,854.509 | JUST_RdRp1<br>Specific |
|                                                |         |        |        |            |                        |
| JUST_N1<br>+JUST_RdRp1<br>+JUST_E1             | 103.59  | 26.544 | 82.272 | 10,984.571 | JUST_N1 Specific       |
|                                                |         |        | 79.069 | 8,844.529  | JUST_E1 Specific       |
|                                                |         |        |        |            |                        |
| JUST_N1<br>+JUST_E1<br>+Beta-actin             | 117.199 | 22.999 | 81.825 | 29,259.492 | JUST_N1 Specific       |
|                                                |         |        | 78.487 | 28,967.324 | JUST_E1 Specific       |
|                                                |         |        | 85.780 | 29,502.145 | Beta-actin specific    |
|                                                |         |        | 87.731 | 42,329.117 |                        |
|                                                |         |        |        |            |                        |
| JUST_N1<br>+JUST_E1<br>+GADPH                  | 117.199 | 23.226 | 82.203 | 56,078.969 | JUST_N1 Specific       |
|                                                |         |        | 78.434 | 15,534.940 | JUST_E1 Specific       |
|                                                |         |        |        |            |                        |
| <b>Quadruplex</b>                              |         |        |        |            |                        |
|                                                |         |        |        |            |                        |
| JUST_N1<br>+JUST_E1<br>+JUST_S1<br>+JUST_RdRp1 | 103.59  | 26.805 | 82.120 | 4,701.885  | JUST_N1 Specific       |
|                                                |         |        | 77.543 | 9,604.580  | JUST_RdRp1<br>Specific |
|                                                |         |        |        |            |                        |

**Table S3. The efficiency values with 95% confidence interval for the assay considering Sansure, as well as, Sansure and S-gene amplification as the gold standard**

|                                                                                           | Sensitivity                  | Specificity                | PPV                        | NPV                        | LR+                    | LR-                  | Kappa index |
|-------------------------------------------------------------------------------------------|------------------------------|----------------------------|----------------------------|----------------------------|------------------------|----------------------|-------------|
| Considering Sansure as standard (n=90)                                                    | 89.09%<br>77.75% to 95.89%   | 22.86%<br>10.42% to 40.14% | 64.47%<br>59.71% to 68.97% | 57.14%<br>33.57% to 77.86% | 1.15<br>0.94 to 1.41   | 0.48<br>0.18 to 1.26 | 0.134       |
| Considering Sansure & S gene as standard (n=82, except undetermined S gene amplification) | 96.67%<br>88.47% to 99.59%   | 54.55%<br>32.21% to 75.61% | 85.29%<br>78.54% to 90.19% | 85.71%<br>59.31% to 96.11% | 2.13<br>1.34 to 3.37   | 0.06<br>0.01 to 0.25 | 0.578       |
| Column based extraction_ Considering Sansure (n=90)                                       | 96.83%<br>89.00% to 99.61%   | 92.59%<br>75.71% to 99.09% | 96.83%<br>88.93% to 99.14% | 92.59%<br>76.09% to 98.00% | 13.07<br>3.44 to 49.64 | 0.03<br>0.01 to 0.13 | 0.894       |
| Column based extraction_ Considering Sansure & S gene as standard (n=89)                  | 100.00%<br>94.13% to 100.00% | 92.86%<br>76.50% to 99.12% | 96.83%<br>88.92% to 99.15% | 100.00%                    | 14.00<br>3.68 to 53.23 | 0.00                 | 0.947       |

**Supplementary table S4. Melting curve analysis results**

| RNA extraction type                | Sample types (number)                                                | Both N and E gene-specific melt curve peak | Only N gene-specific melt curve peak | Only E gene-specific melt curve peak |
|------------------------------------|----------------------------------------------------------------------|--------------------------------------------|--------------------------------------|--------------------------------------|
| Crude RNA extraction system        | Concordant positive samples (49)                                     | 22                                         | 06                                   | 21                                   |
|                                    | False-positive (SYBR Green positive – Sansure Negative) samples (27) | 10                                         | 01                                   | 16                                   |
| Column-based RNA extraction system | Concordant positive samples                                          | 48                                         | 13                                   | 0                                    |
|                                    | False-positive (SYBR Green positive – Sansure Negative) samples      | 0                                          | 02                                   | 0                                    |

**Supplementary Table S5: Cost of the total process per sample**

| <b>Reagents and Consumables</b> | <b>Cost (per sample)</b> | <b>Cost (per sample)</b> |
|---------------------------------|--------------------------|--------------------------|
| Lucigen RNA extraction kit      | 10 BDT ( \$0.12)         | -                        |
| Column Based RNA Extraction Kit | -                        | 400 BDT (\$4.72)         |
| Luna RT-PCR kit                 | 120 BDT ( \$1.42)        | 120 BDT (\$1.42)         |
| Primers                         | 3 BDT ( \$0.03)          | 3 BDT( \$0.03)           |
| Consumables                     | 7 BDT ( \$0.08)          | 7 BDT( \$0.08)           |
| Total                           | 140 BDT ( \$1.65)        | 530 BDT (~\$6)           |



Supplementary Fig. S1: Gel Electropherogram of RT-PCR amplified products

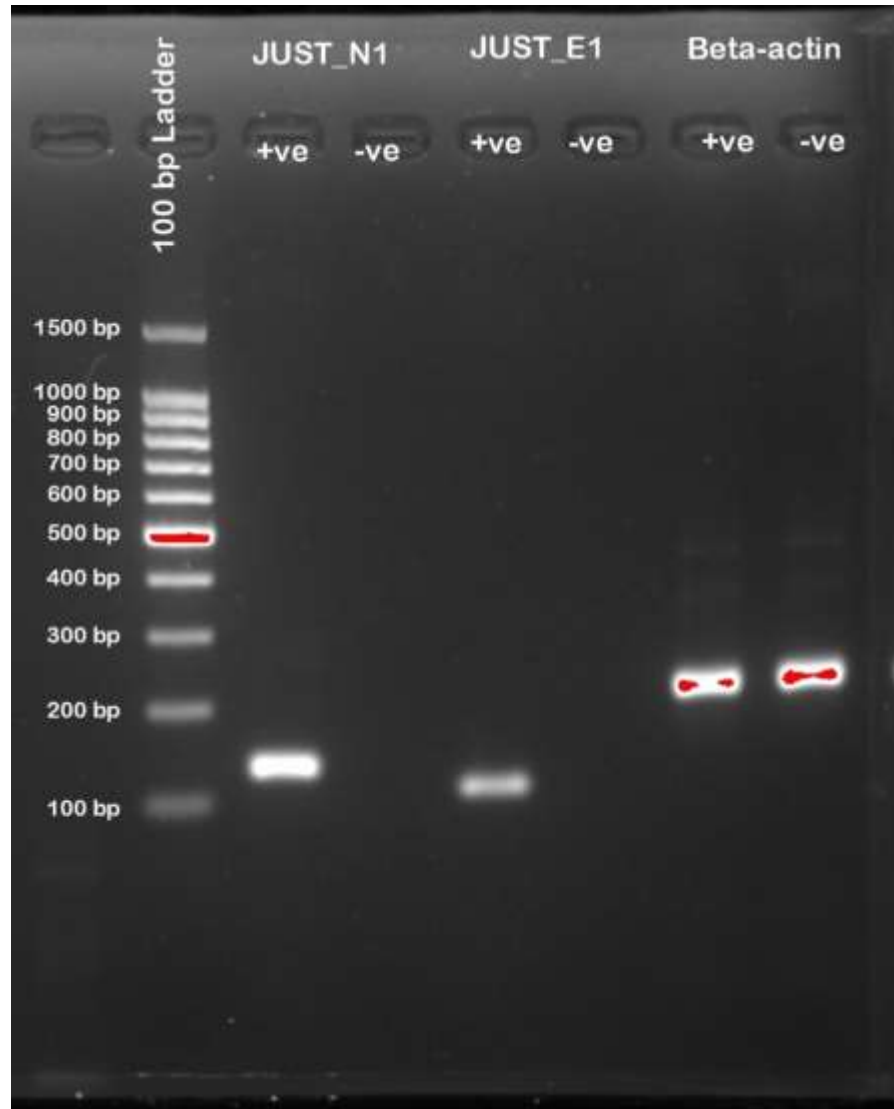

a

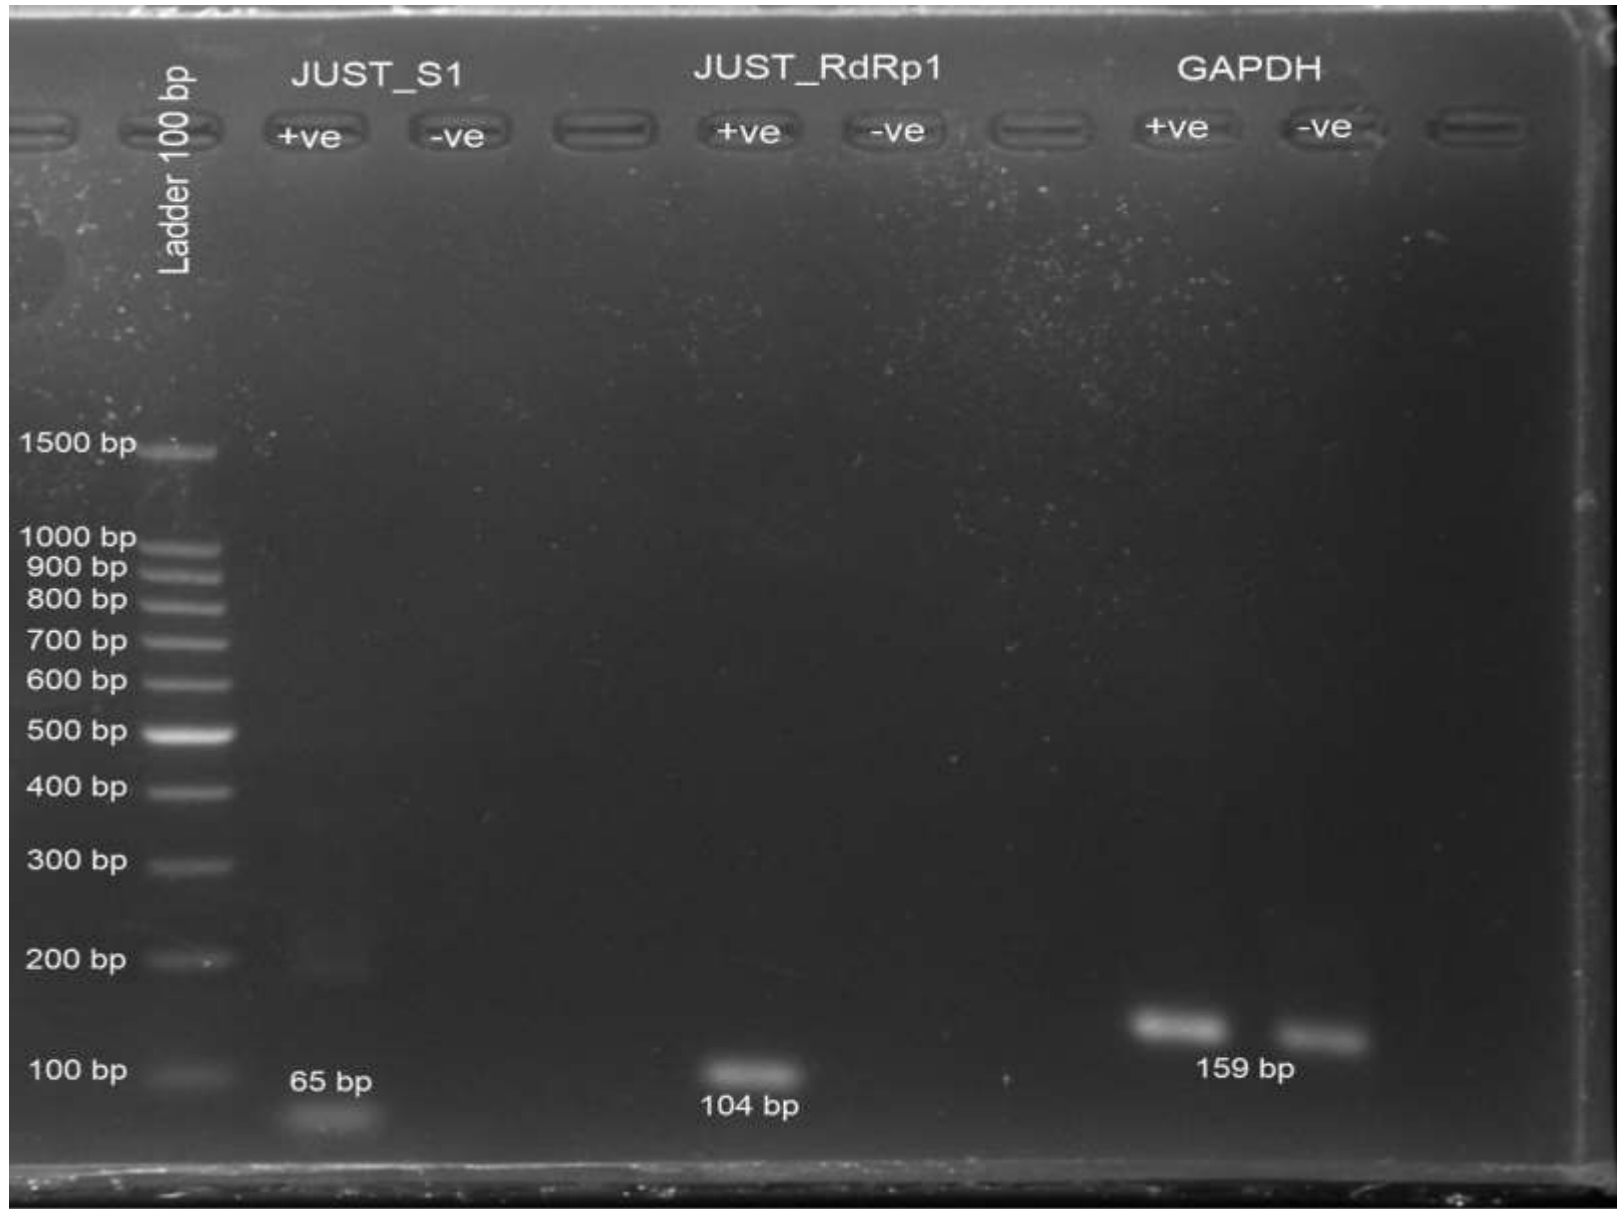

b

Supplementary Fig. S2: melting curve of different genes and final multiplex

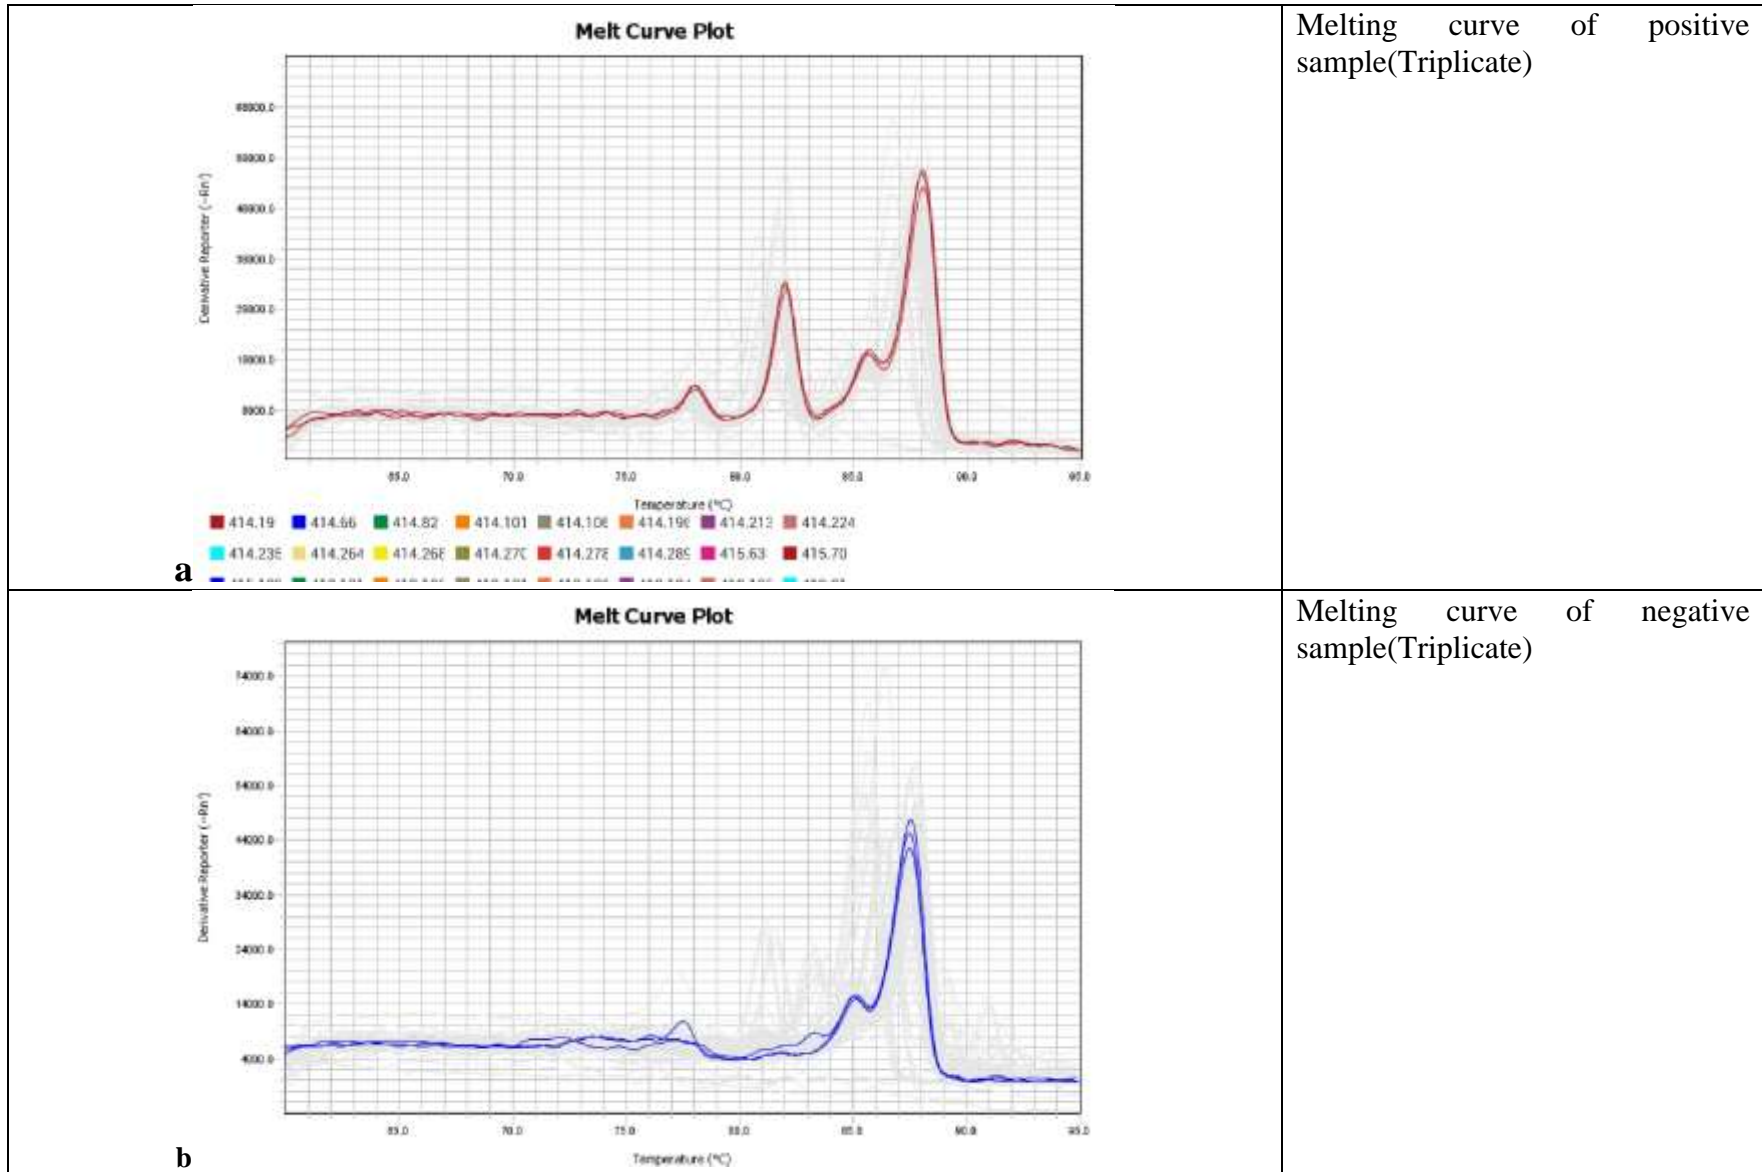

**c**

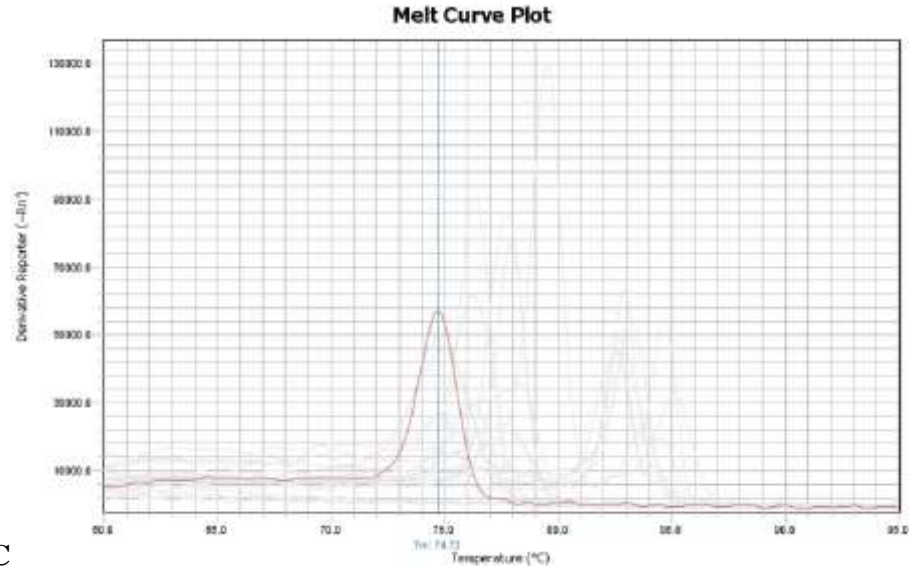

Melting curve of positive sample with S gene

**d**

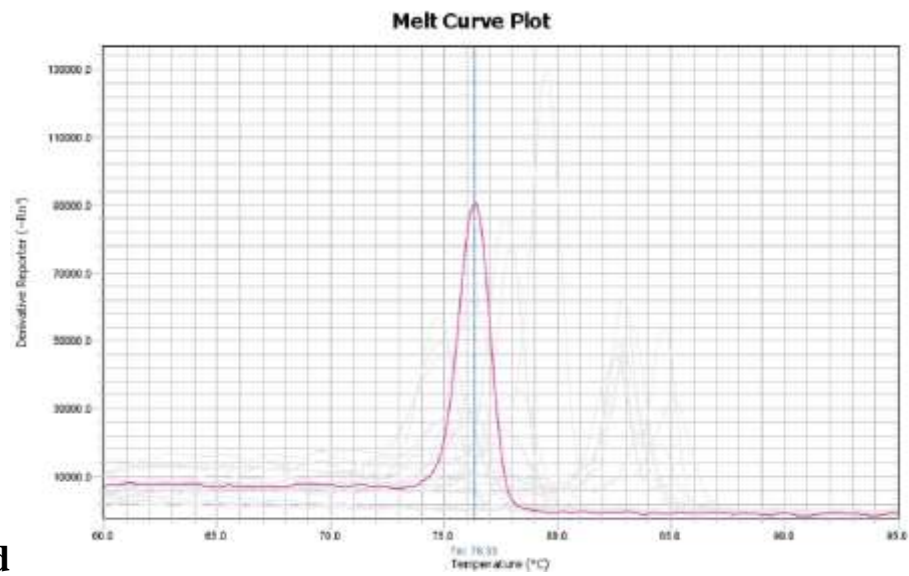

Melting curve of positive sample with RdRp gene

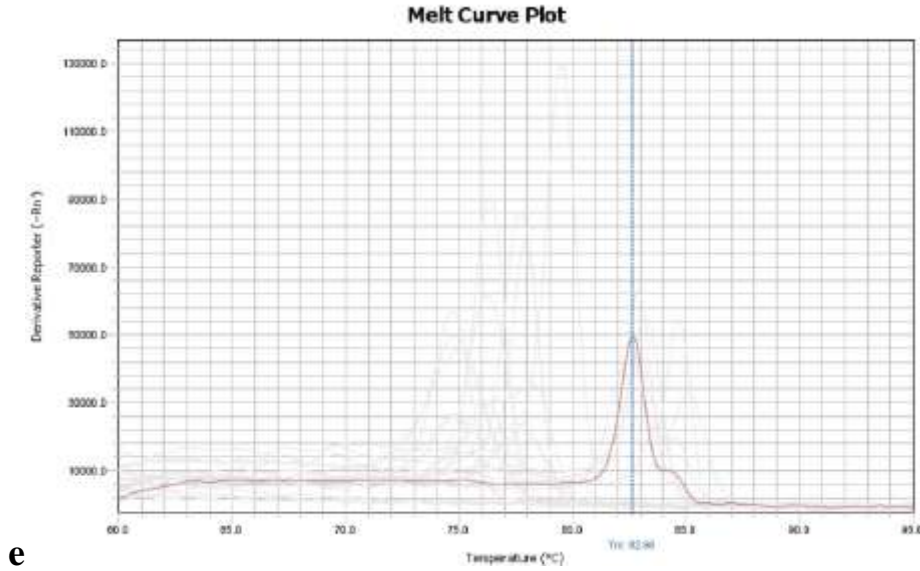

Melting curve of positive sample with GAPDH gene.

Supplementary Fig. S3: Melting curve plot of different genes in different primer combinations.

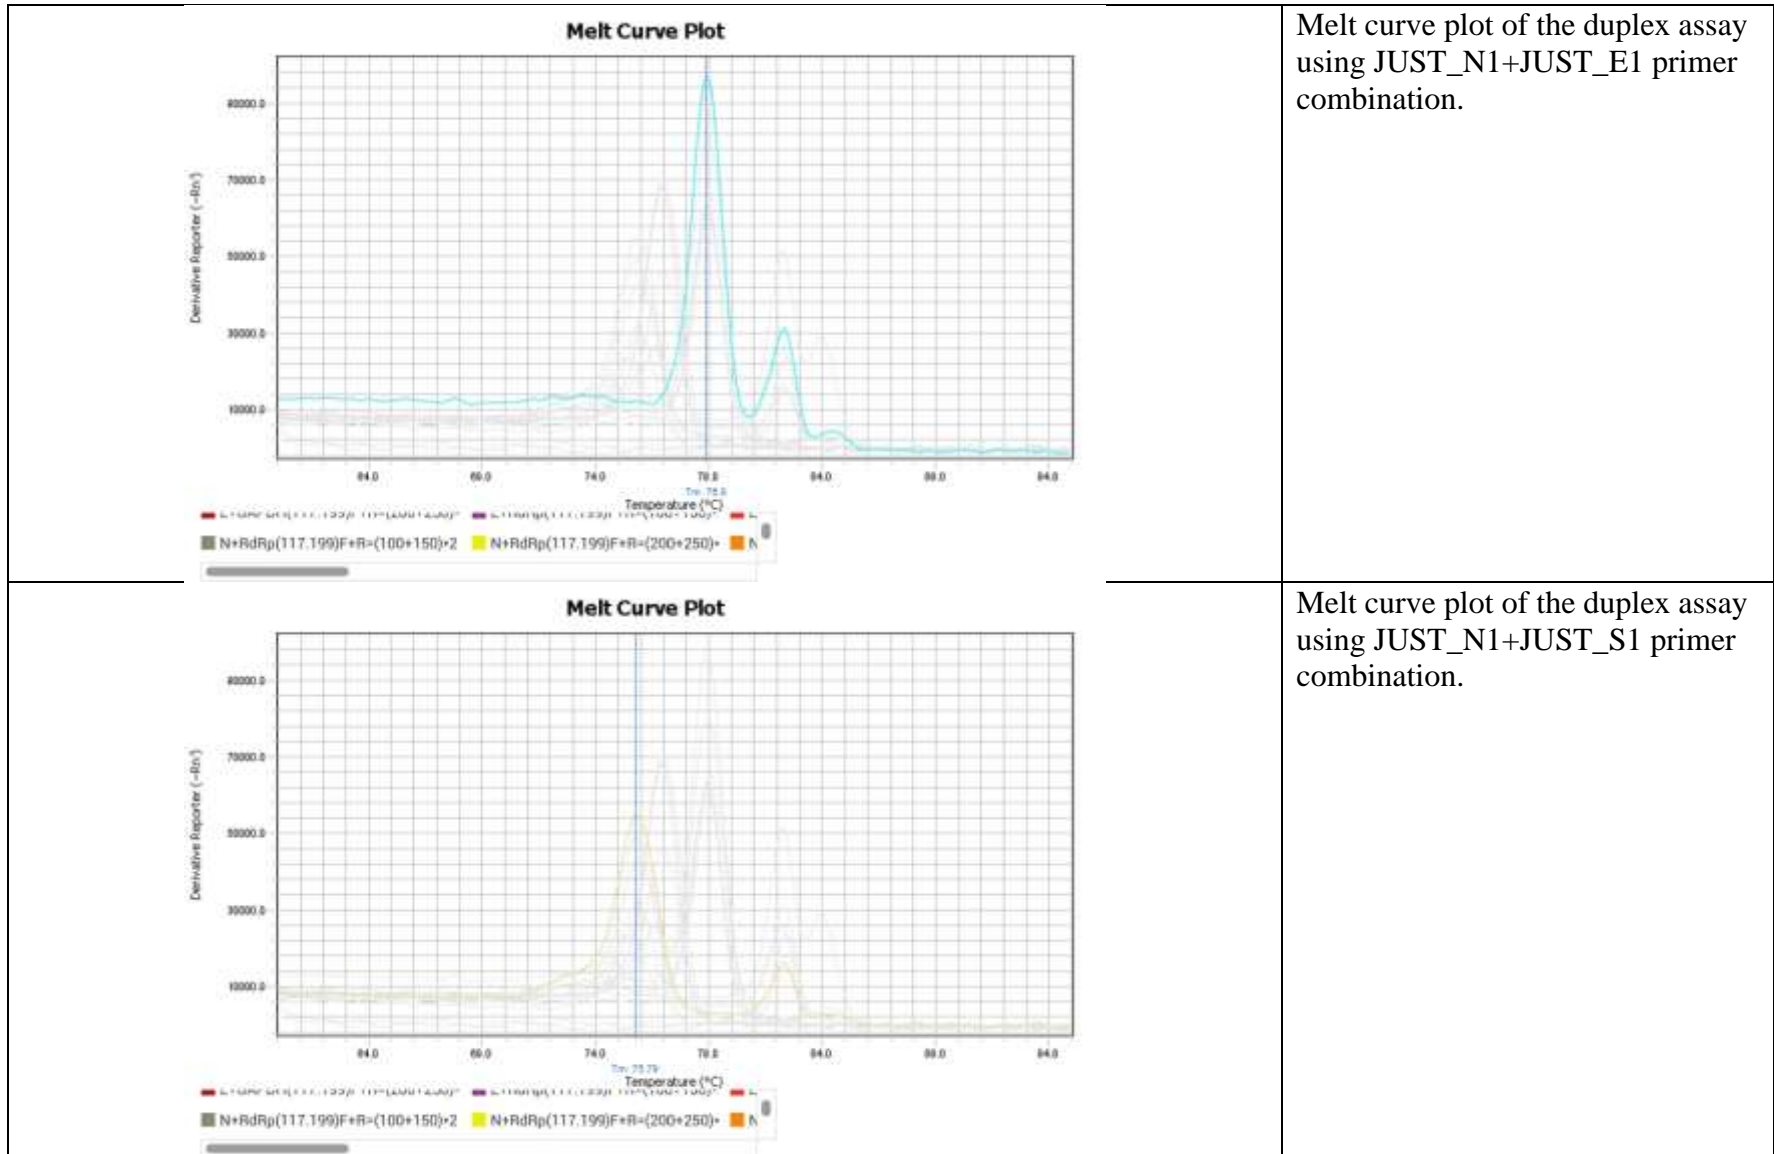

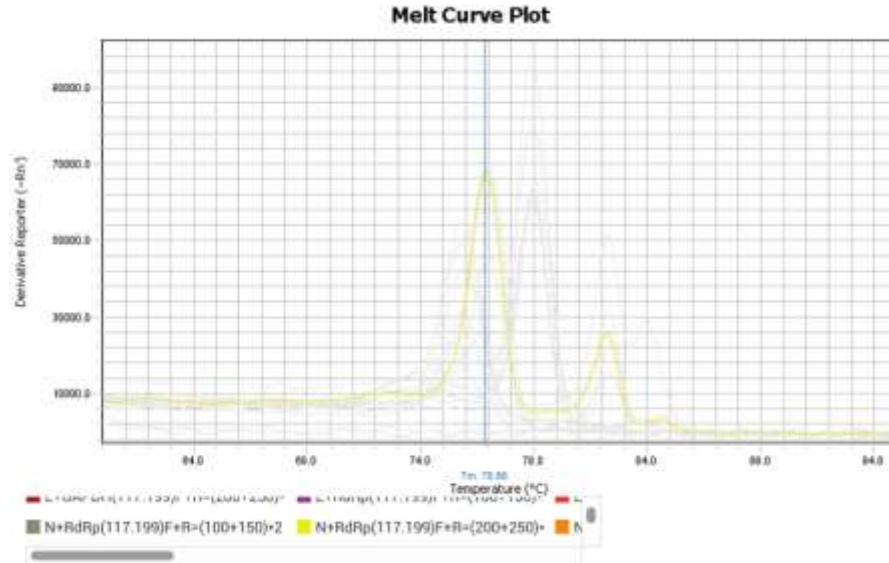

Melt curve plot of the duplex assay using JUST\_N1+JUST\_RdRp1 primer combination.

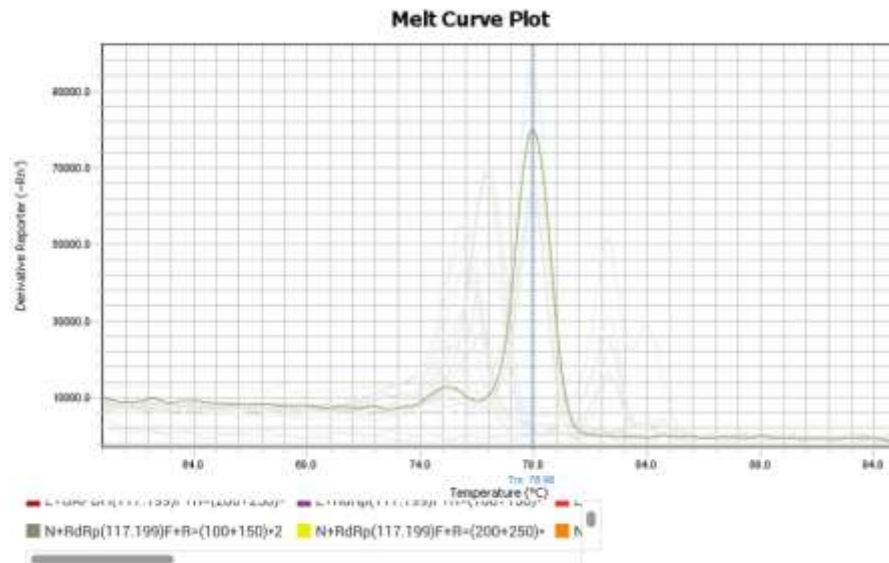

Melt curve plot of the duplex assay using JUST\_E1+JUST\_S1 primer combination.

Melt Curve Plot

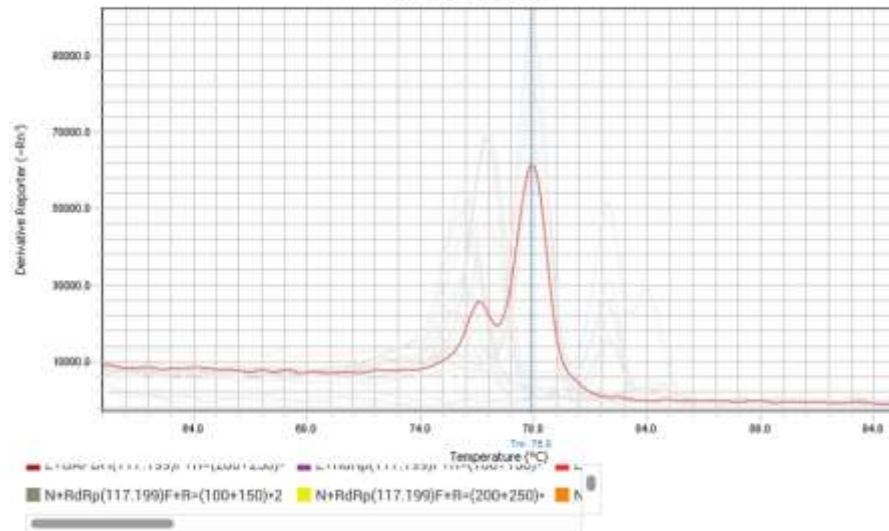

Melt curve plot of the duplex assay using JUST\_E1+JUST\_RdRp1 primer combination.

Melt Curve Plot

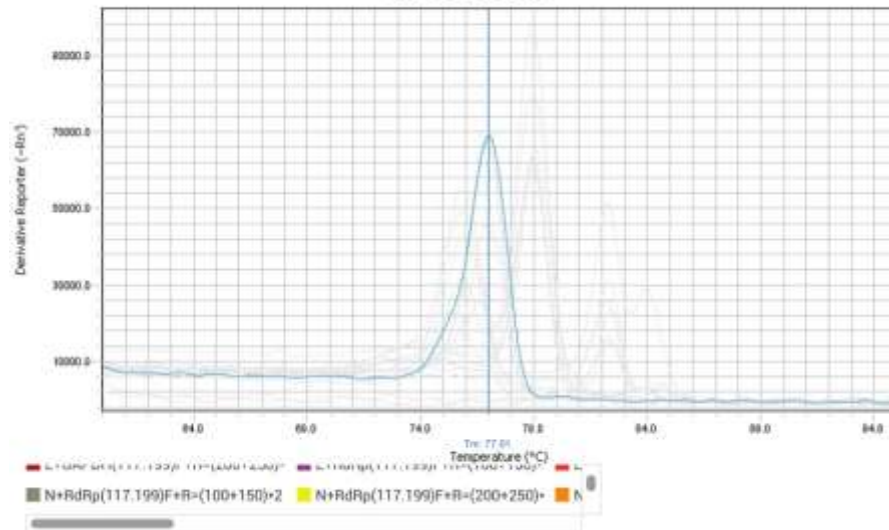

Melt curve plot of the duplex assay using JUST\_S1+JUST\_RdRp1 primer combination.



Melt Curve Plot

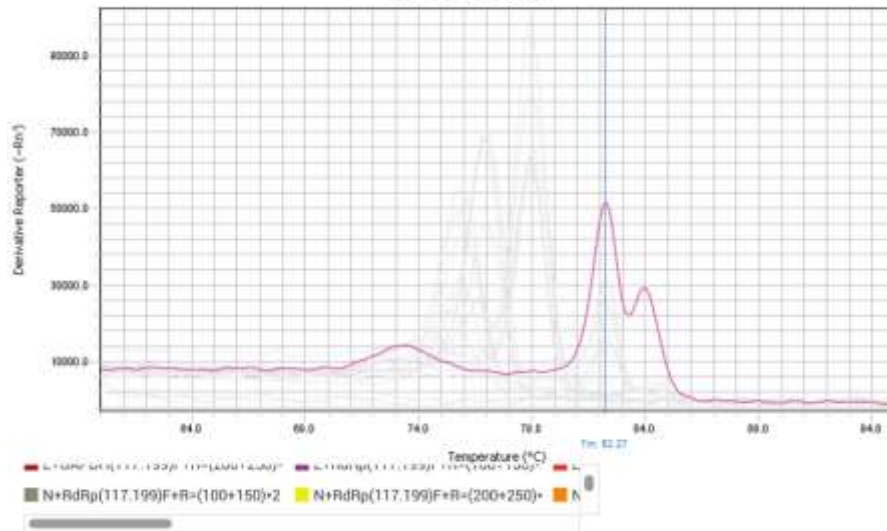

Melt curve plot of the duplex assay using JUST\_N1+GAPDH primer combination.

Melt Curve Plot

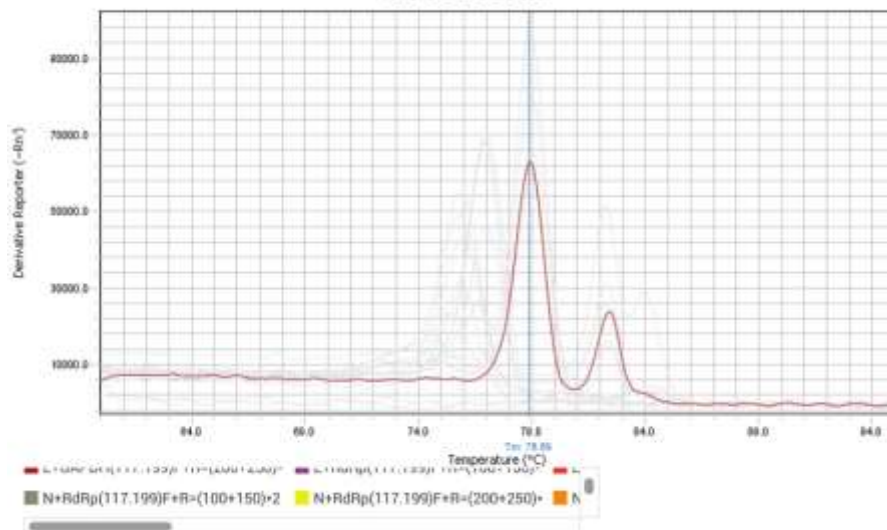

Melt curve plot of the duplex assay using JUST\_E1+GAPDH primer combination.

Melt Curve Plot

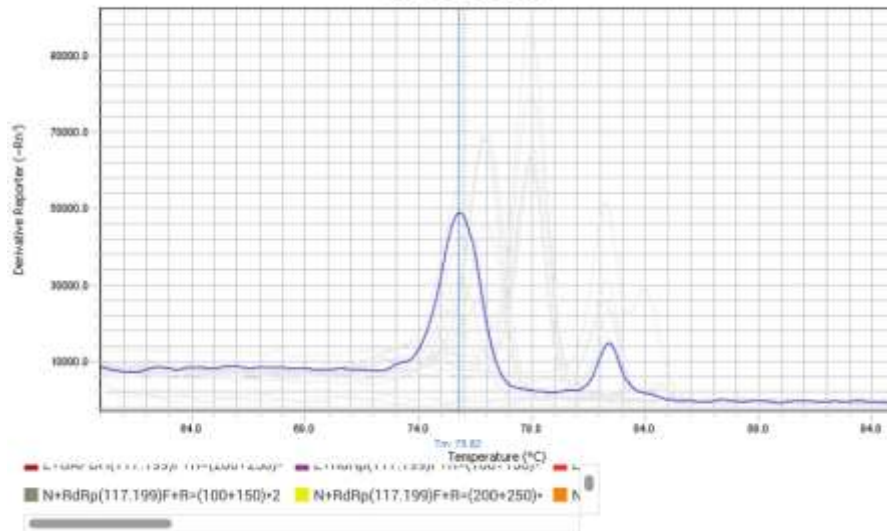

Melt curve plot of the duplex assay using JUST\_S1+GAPDH primer combination.

Melt Curve Plot

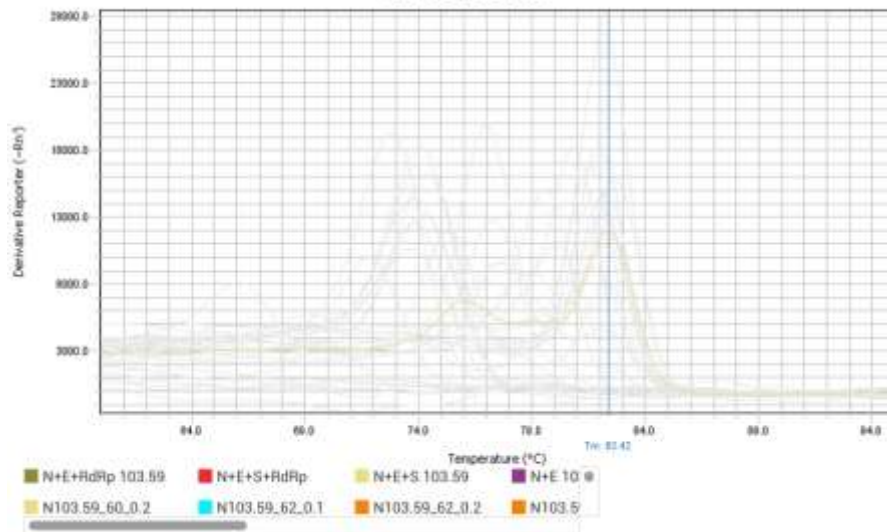

Melt curve plot of the triplex assay using JUST\_N1+ JUST\_E1+ JUST\_S1 primer combination.

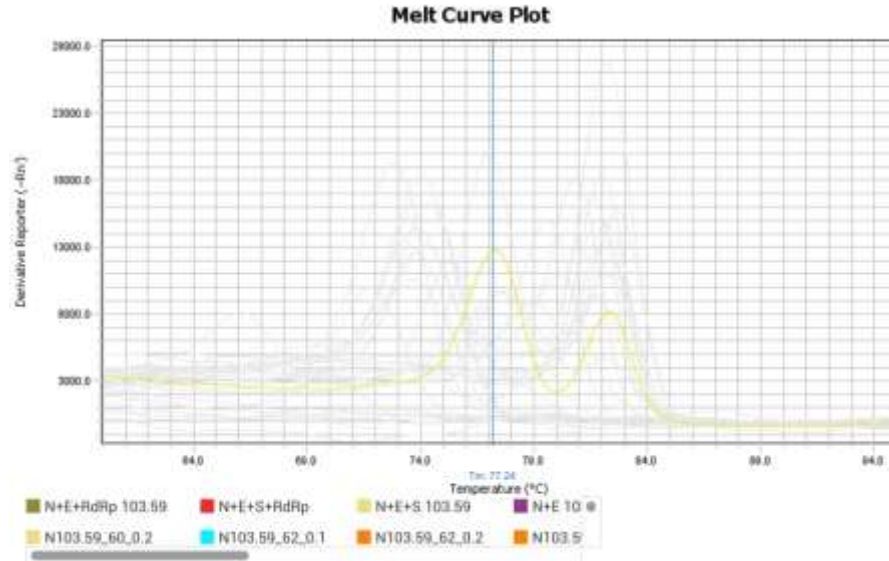

Melt curve plot of the triplex assay using JUST\_N1+ JUST\_RdRp1+ JUST\_S1 primer combination.

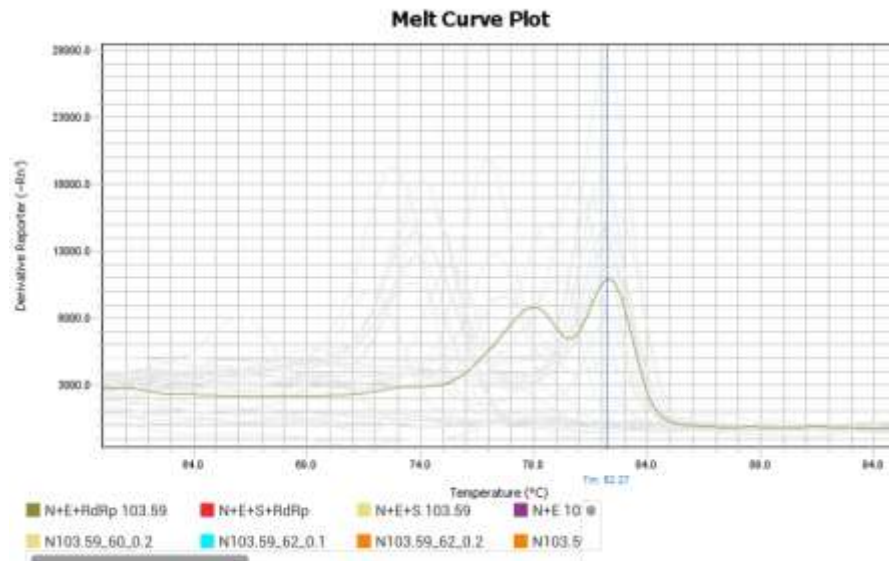

Melt curve plot of the triplex assay using JUST\_N1+ JUST\_RdRp1+ JUST\_E1 primer combination.

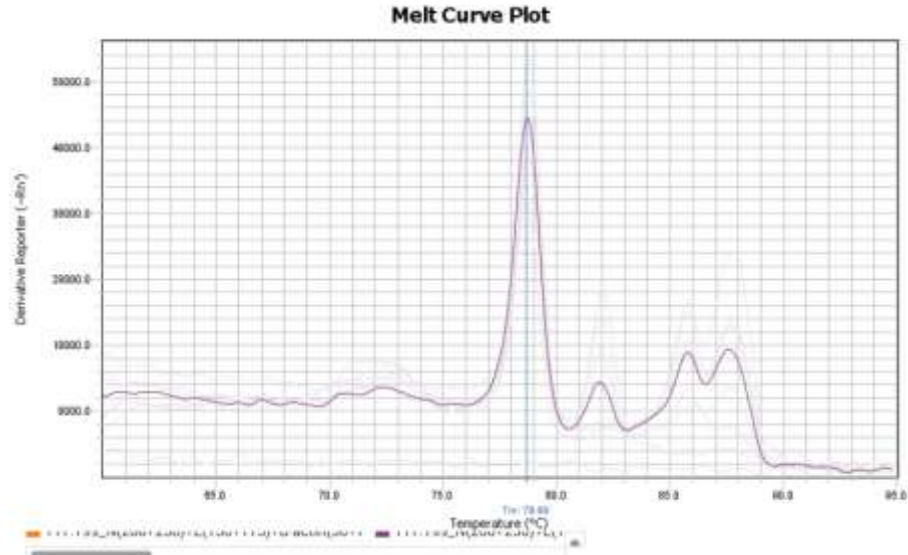

Melt curve plot of the triplex assay using JUST\_N1+ JUST\_E1+ Beta-actin primer combination.

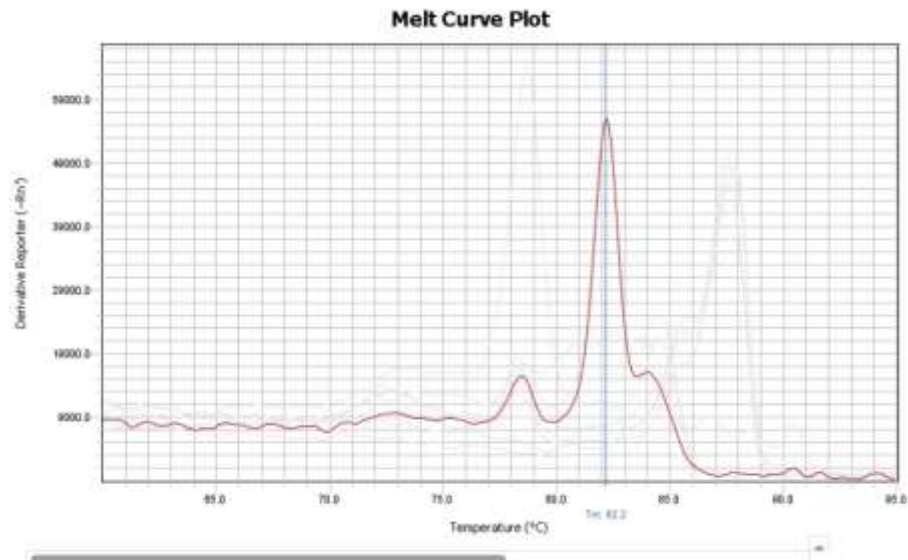

Melt curve plot of the triplex assay using JUST\_N1+ JUST\_E1+ GAPDH primer combination.

Melt Curve Plot

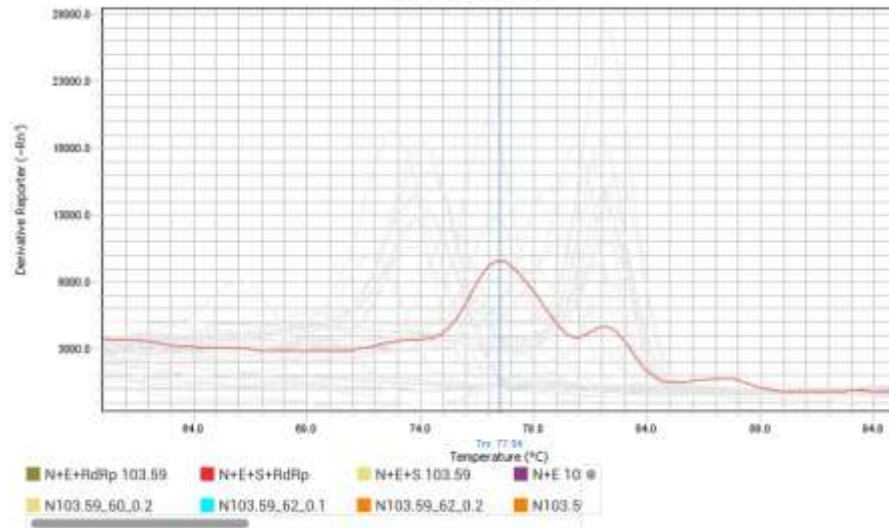

Melt curve plot of the quadruplex assay using JUST\_N1+ JUST\_E1+ JUST\_S1+ JUST\_RdRp1 primer combination.

Supplementary Fig. S4: Melting curve plot of selected genes in different primer conditions.

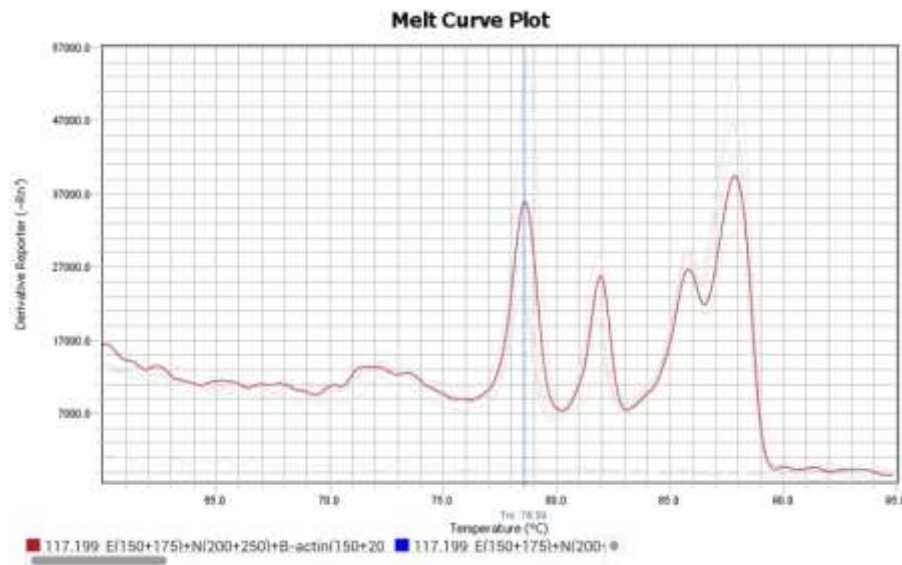

Melt curve plot of the triplex assay using JUST\_N1+ JUST\_E1+ Beta-actin primer combination. Primer concentration as follow: JUST\_N1\_F=200 nM, JUST\_N1\_R=250 nM, JUST\_E1\_F=150 nM, JUST\_E1\_R=175nM, Beta-actin\_F=150 nM and Beta-actin\_R=200 nM

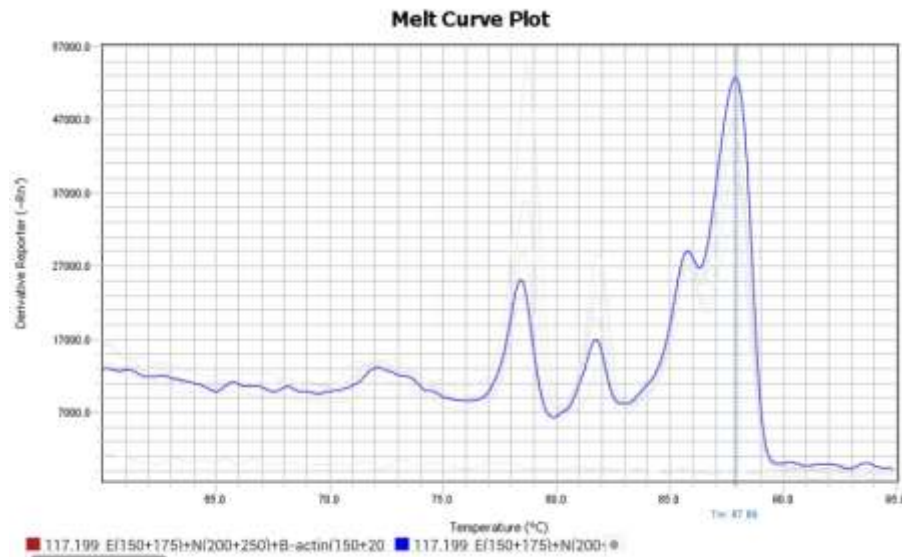

Melt curve plot of the triplex assay using JUST\_N1+ JUST\_E1+ Beta-actin primer combination. Primer concentration as follow: JUST\_N1\_F=200 nM, JUST\_N1\_R=250 nM, JUST\_E1\_F=150 nM, JUST\_E1\_R=175nM, Beta-actin\_F=200 nM and Beta-actin\_R=250 nM

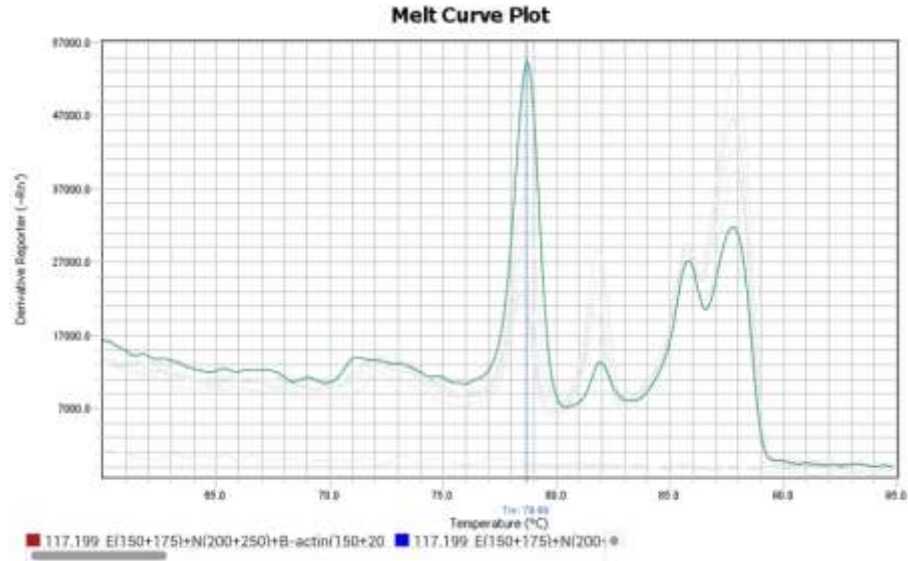

Melt curve plot of the triplex assay using JUST\_N1+ JUST\_E1+ Beta-actin primer combination. Primer concentration as follow:  
 JUST\_N1\_F=300 nM,  
 JUST\_N1\_R=350 nM,  
 JUST\_E1\_F=150 nM,  
 JUST\_E1\_R=175nM,  
 Beta-actin\_F=150 nM and  
 Beta-actin\_R=200 nM

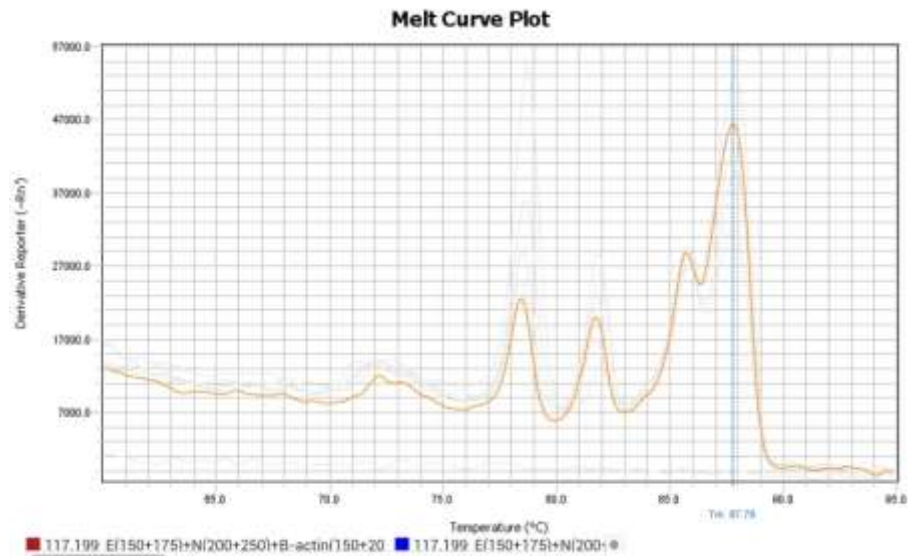

Melt curve plot of the triplex assay using JUST\_N1+ JUST\_E1+ Beta-actin primer combination. Primer concentration as follow:  
 JUST\_N1\_F=300 nM,  
 JUST\_N1\_R=350 nM,  
 JUST\_E1\_F=150 nM,  
 JUST\_E1\_R=175nM,  
 Beta-actin\_F=200 nM and  
 Beta-actin\_R=250 nM

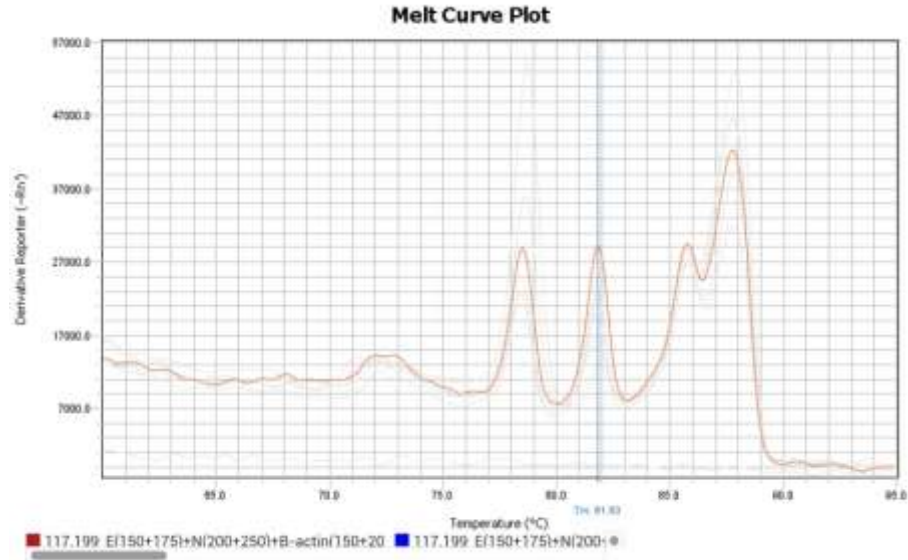

Melt curve plot of the triplex assay using JUST\_N1+ JUST\_E1+ Beta-actin primer combination. Primer concentration as follow:  
 JUST\_N1\_F=300 nM,  
 JUST\_N1\_R=400 nM,  
 JUST\_E1\_F=150 nM,  
 JUST\_E1\_R=175nM,  
 Beta-actin\_F=150 nM and  
 Beta-actin\_R=200 nM

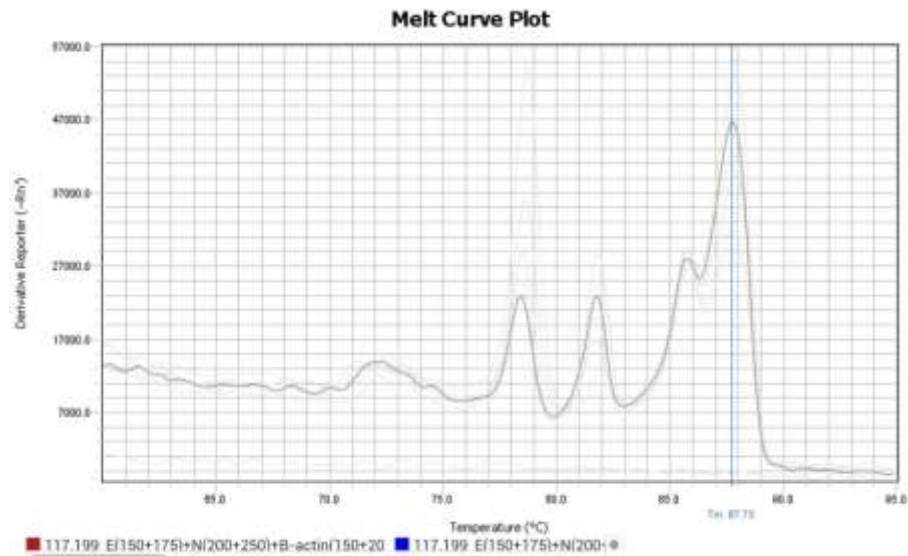

Melt curve plot of the triplex assay using JUST\_N1+ JUST\_E1+ Beta-actin primer combination. Primer concentration as follow:  
 JUST\_N1\_F=300 nM,  
 JUST\_N1\_R=400 nM,  
 JUST\_E1\_F=150 nM,  
 JUST\_E1\_R=175nM,  
 Beta-actin\_F=200 nM and  
 Beta-actin\_R=250 nM



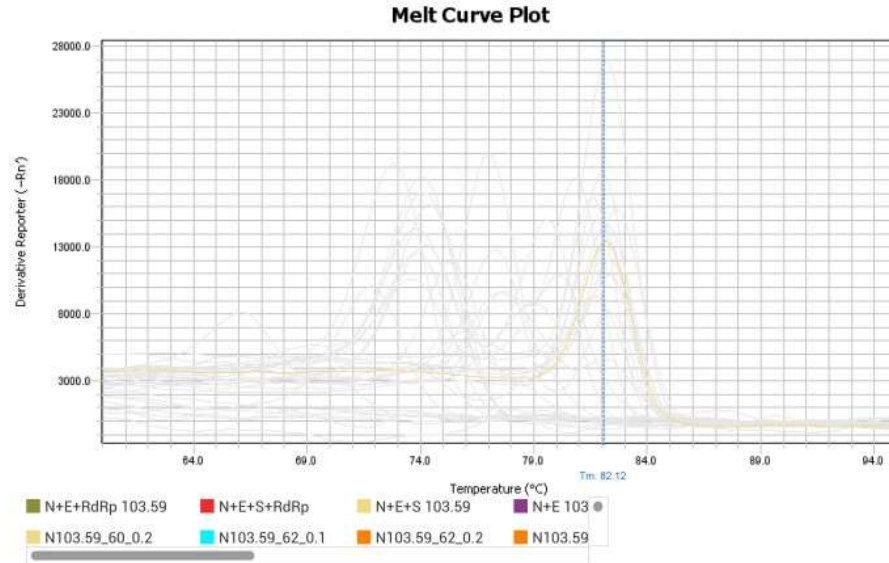

Melt curve plot for JUST\_N1.  
 Primer concentration 100 nM and  
 Annealing Temperature 60°C

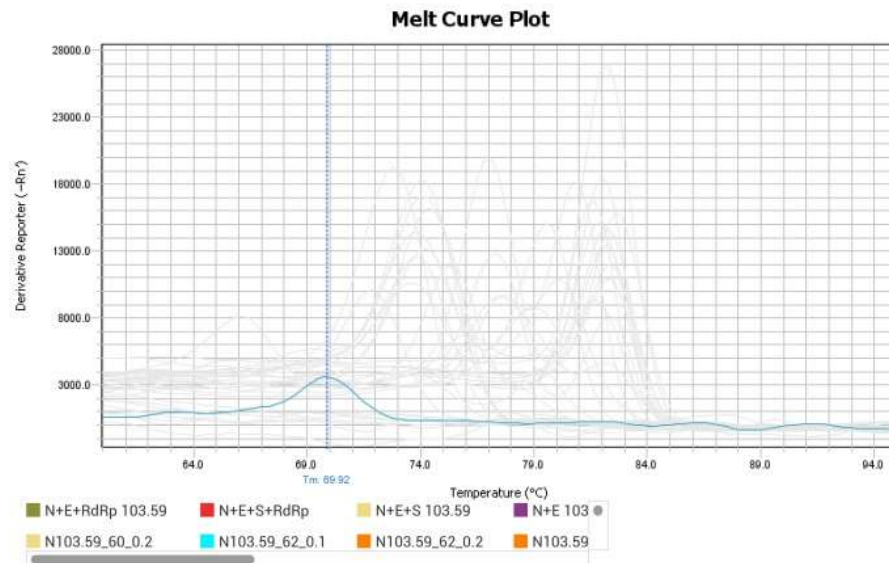

Melt curve plot for JUST\_N1.  
 Primer concentration 50 nM and  
 Annealing Temperature 60°C

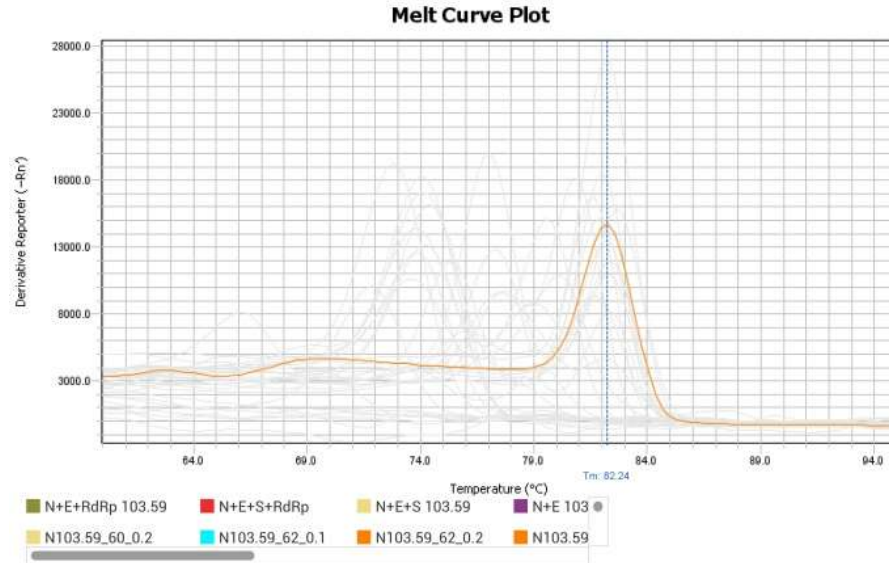

Melt curve plot for JUST\_N1.  
Primer concentration 100 nM and  
Annealing Temperature 62°C

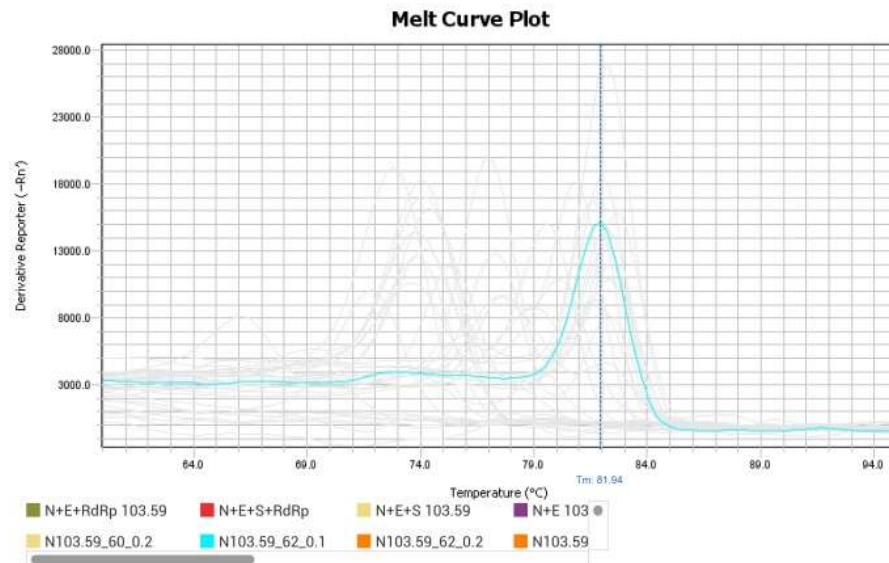

Melt curve plot for JUST\_N1.  
Primer concentration 50 nM and  
Annealing Temperature 62°C

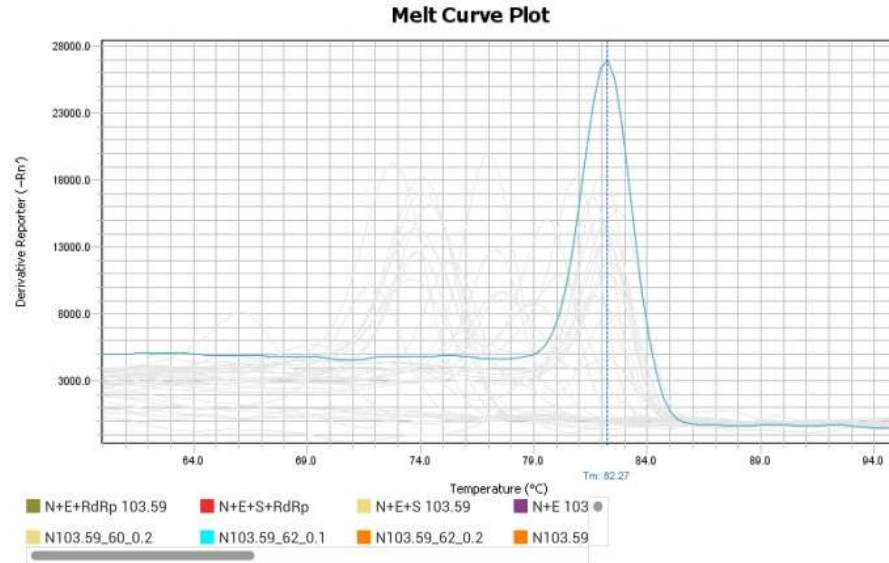

Melt curve plot for JUST\_N1.  
Primer concentration 100 nM and  
Annealing Temperature 64°C

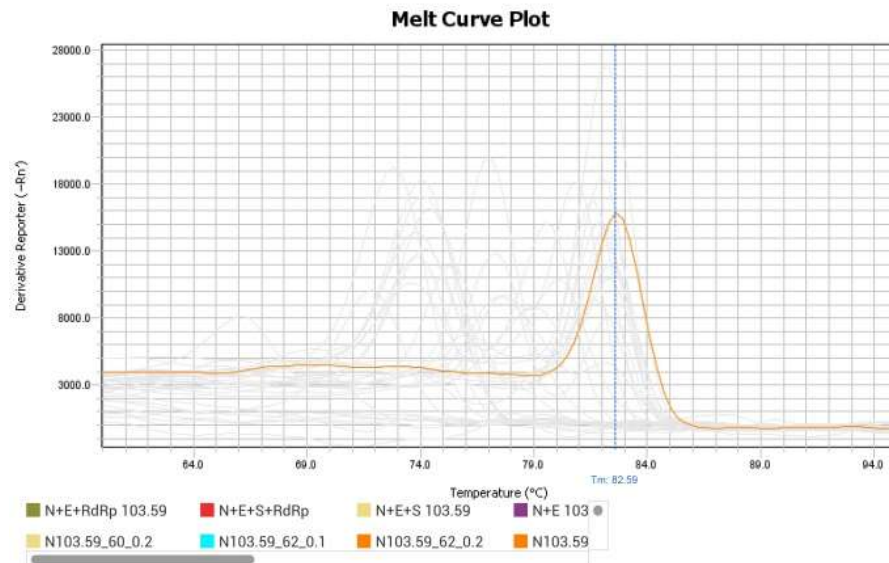

Melt curve plot for JUST\_N1.  
Primer concentration 50 nM and  
Annealing Temperature 64°C

Supplementary Fig. S5: Gel Run image of the contradictory samples and representative concordant positive samples.

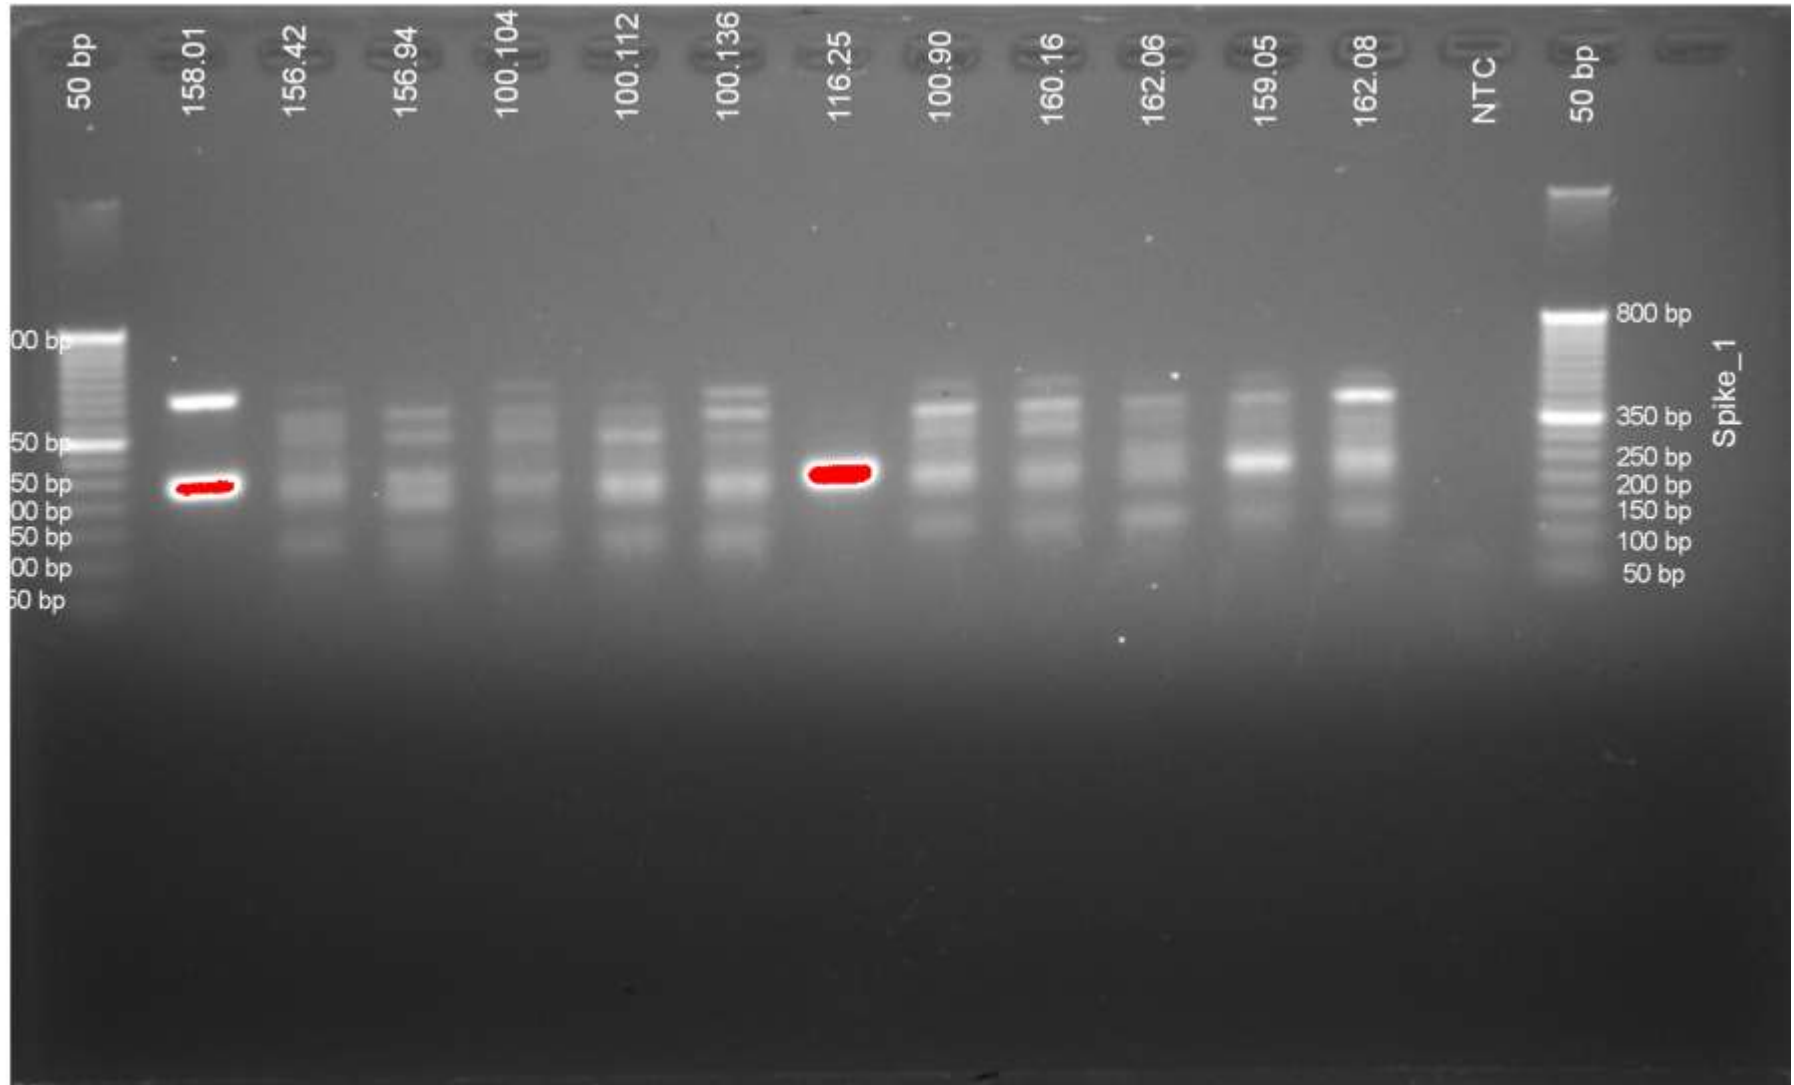

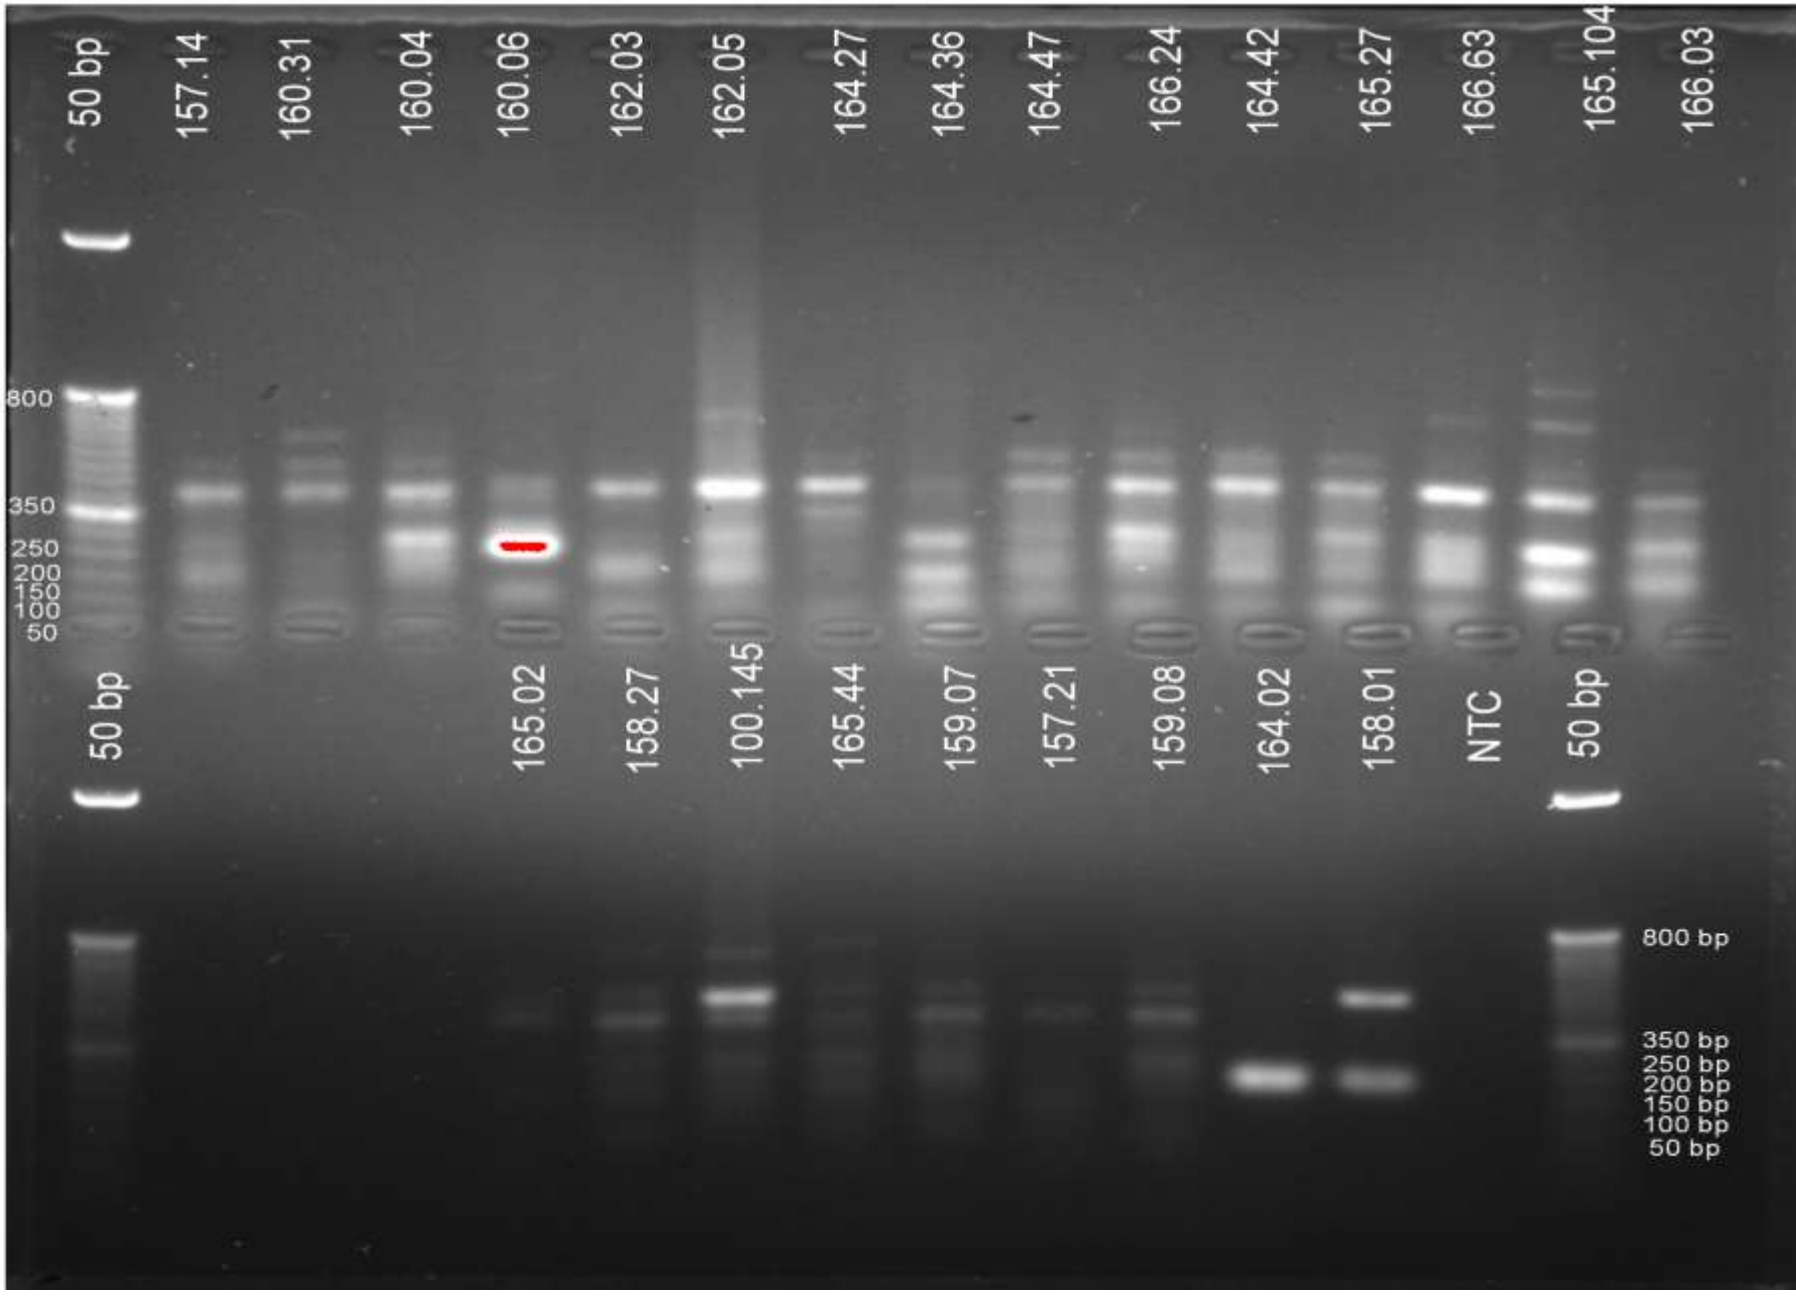

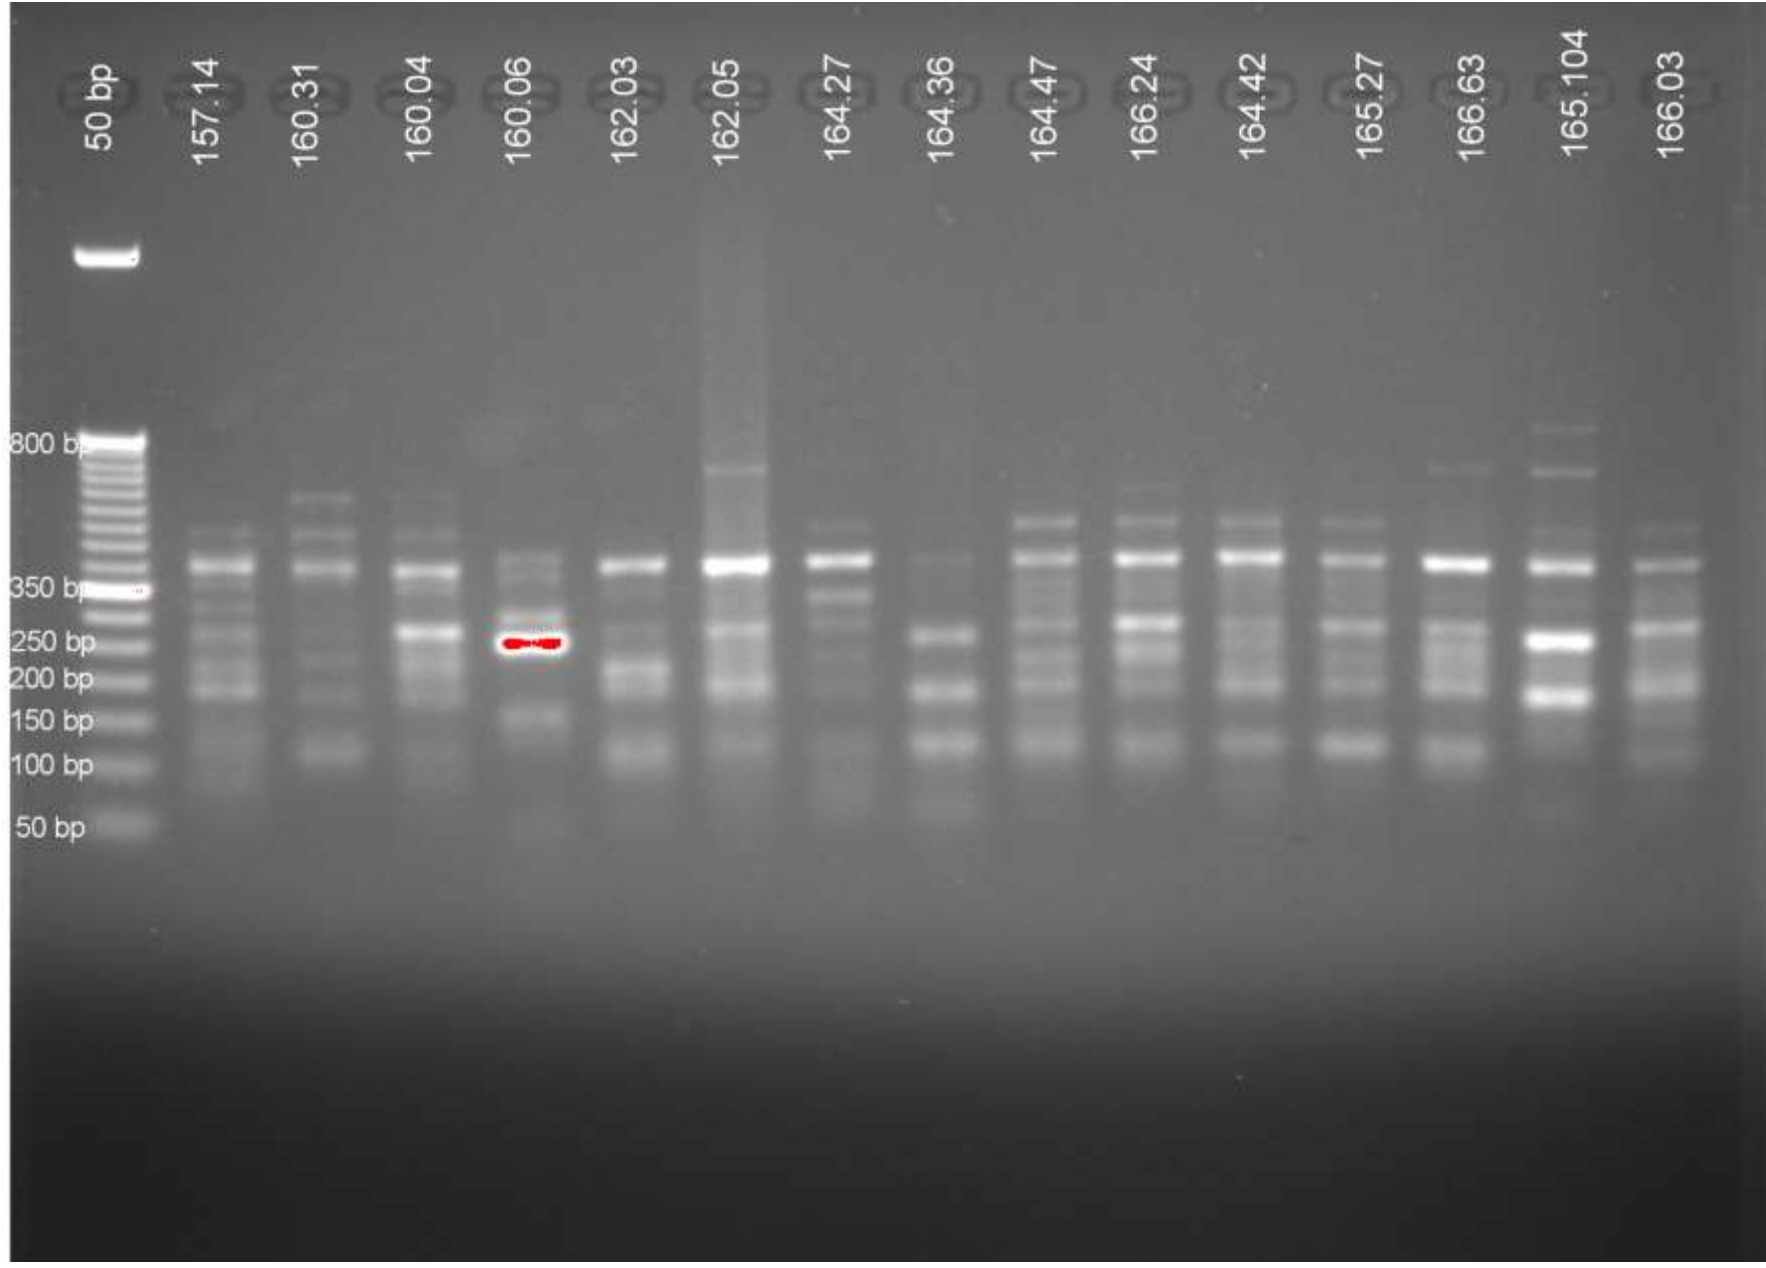

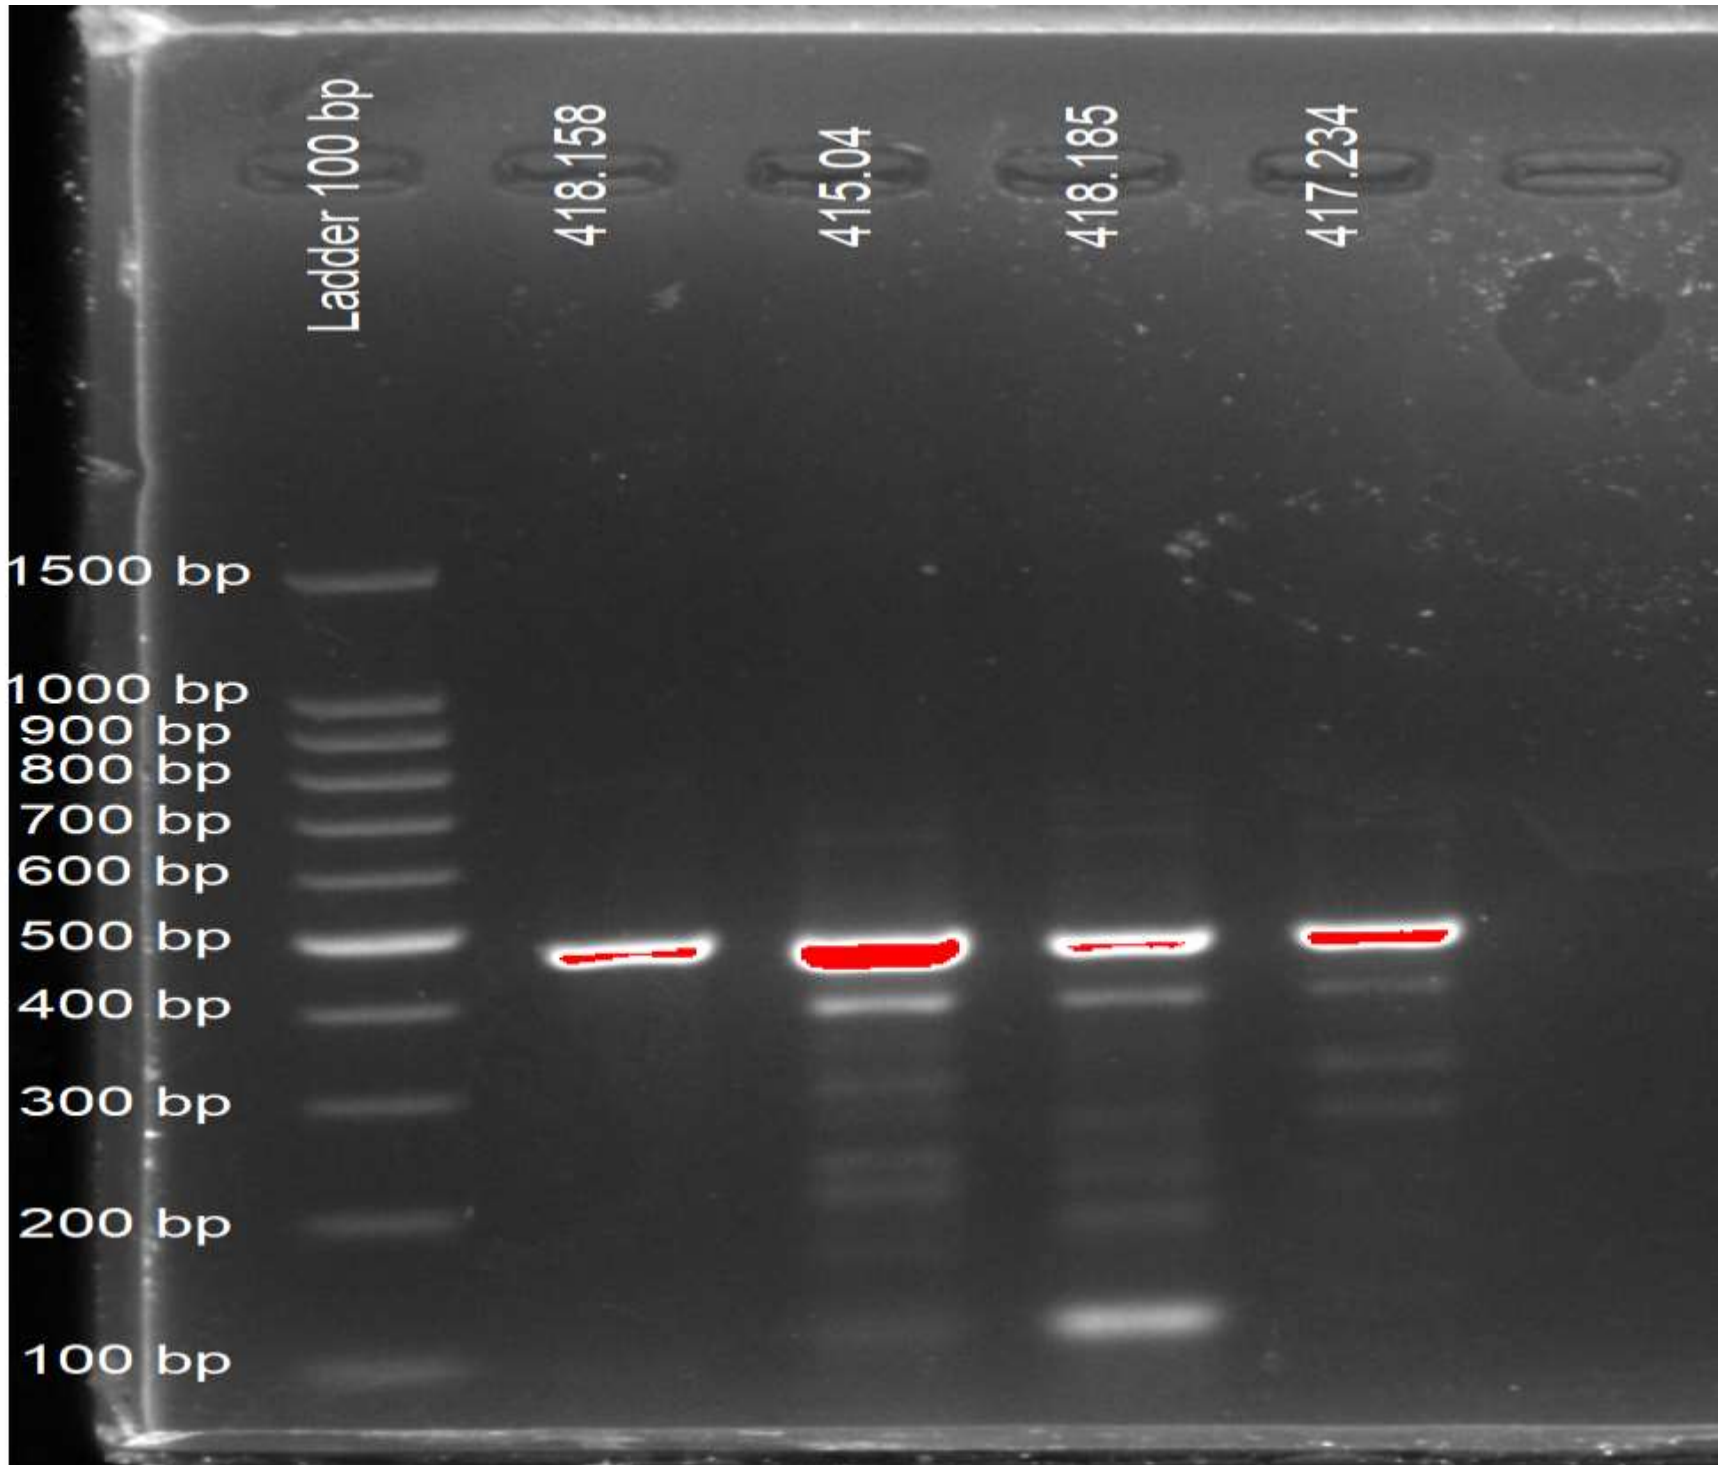

Supplementary Fig. S6

| Species/AbGroup N | * | * | * | * | * | * | * | * | * | * | * | * | * |   | * | * | * | * | * | * |   |
|-------------------|---|---|---|---|---|---|---|---|---|---|---|---|---|---|---|---|---|---|---|---|---|
| 1. Refseq         | C | T | C | A | A | G | T | G | T | C | T | G | T | G | G | A | T | C | A | C | G |
| 2. 164.02         | C | T | C | A | A | G | T | G | T | C | T | G | T | K | G | A | T | C | A | C | G |
| 3. 164.36         | C | T | C | A | A | G | T | G | T | C | T | G | T | G | G | A | T | C | A | C | G |
| 4. 165.104        | C | T | C | A | A | G | T | G | T | C | T | G | T | G | G | A | T | C | A | C | G |
